# Supplementary material for: Analyzing super-enhancer temporal dynamics reveals potential critical enhancers and their gene regulatory networks underlying skeletal muscle development
Source: HighWire-hosted journal article supplement (doi:10.1101/gr.278344.123), 2024-10-21
Supplement: Supplemental_Tables_S1.xlsx [file Supplemental_Tables_S1.xlsx]

## Sheet: Supplemental_Table_S1
Supplemental Table S1. Quality assessment metrics for CUT&Tag data
Sample	Alignment rate	Raw reads	Retained reads	Insert size (bp)	FRiP	TSS enrichment	NRF	PBC1	PBC2
D180_1	0.98	42876218	33109736	342	0.62	8.52	0.9	0.94	23.26
D180_2	0.98	40825740	33477106	337	0.63	8.71	0.91	0.94	27.65
D60_1	0.98	39983558	31187175	448	0.67	7.96	0.75	0.87	13.16
D60_2	0.98	40247832	33003221	444	0.68	7.22	0.76	0.88	14.48
D0_1	0.97	46599042	33085320	390	0.53	6.94	0.9	0.93	19.18
D0_2	0.98	48384142	35320423	368	0.53	5.88	0.93	0.95	25.83
E90_1	0.98	45229414	29592707	440	0.47	7.88	0.91	0.93	18.98
E90_2	0.98	42123452	29342589	471	0.57	9.2	0.84	0.9	14.02
E60_1	0.98	46322130	34741597	428	0.34	4.31	0.9	0.93	17.65
E60_2	0.98	48009998	34567199	481	0.35	4.05	0.91	0.93	19.4
FRiP: The fraction of reads in called peak regions
TSS enrichment: Transcription start site (TSS) enrichment values
NRF: Non-Redundant Fraction
PBC1: PCR Bottleneck Coefficient 1
PBC2: PCR Bottleneck Coefficient 2
