# Supplementary material for: Analyzing super-enhancer temporal dynamics reveals potential critical enhancers and their gene regulatory networks underlying skeletal muscle development
Source: HighWire-hosted journal article supplement (doi:10.1101/gr.278344.123), 2024-10-21
Supplement: Supplemental_Tables_S2.xlsx [file Supplemental_Tables_S2.xlsx]

## Sheet: Supplemental_Table_S2
Supplemental Table S2. Number of different types of cis-regulatory elements
Stage	H3K27ac peak	Potential active enhancer	Potential active promoter	Super-enhancer
D180	42981	33636	9345	928
D60	29991	21817	8174	724
D0	30817	22256	8561	727
E90	31138	22620	8518	576
E60	15390	8835	6555	319
