# Supplementary material for: Analyzing super-enhancer temporal dynamics reveals potential critical enhancers and their gene regulatory networks underlying skeletal muscle development
Source: HighWire-hosted journal article supplement (doi:10.1101/gr.278344.123), 2024-10-21
Supplement: Supplemental_Tables_S3.xlsx [file Supplemental_Tables_S3.xlsx]

## Sheet: Supplemental_Table_S3
Supplemental Table S3. Temporal classification of SEs
Chr	Start	End	Pattern
Chr2	80824990	80841624	Con
Chr5	19290652	19311512	Con
Chr13	71752362	71785925	Con
Chr15	93540801	93561178	Con
Chr2	87324248	87419875	Con
Chr16	27545534	27568683	Con
Chr12	24795662	24818091	Con
Chr5	58237912	58249815	Con
Chr13	48010194	48027590	Con
Chr6	131910870	131919436	Con
Chr10	66489847	66499520	Con
Chr14	77925311	77936436	Con
Chr16	71858540	71873214	Con
Chr7	111277772	111291277	Con
Chr6	64175724	64195656	Con
Chr2	65895264	65911746	Con
Chr4	79432201	79467501	Con
Chr5	11808779	11823589	Con
Chr8	131377618	131413965	Con
Chr10	24582272	24633408	Con
Chr12	60709114	60742718	Con
Chr7	98568278	98605630	Con
Chr1	220996559	221080666	Con
Chr9	7797534	7855145	Con
Chr14	123344981	123359494	Con
Chr6	71852783	71867498	Con
Chr15	137712185	137735670	Con
Chr3	46593307	46610585	Con
Chr9	124505755	124527926	Con
Chr1	184001530	184062952	Con
Chr1	43274189	43354012	Con
Chr14	29804384	29814170	Con
Chr5	3373218	3393368	Con
Chr1	240685859	240694314	Con
Chr1	240735342	240759726	Con
Chr15	121616751	121646678	Con
Chr6	77567895	77586743	Con
Chr1	107179204	107216120	Con
Chr14	56127714	56160382	Con
Chr8	80887488	80906401	Con
Chr13	72506187	72570875	Con
Chr1	168926679	168947121	Con
Chr4	107425431	107454932	Con
Chr13	25786674	25823830	Con
Chr2	105037555	105062210	Con
Chr14	138912614	138940830	Con
Chr4	59566539	59583758	Con
Chr12	44078080	44122629	Con
Chr7	83070008	83083185	Con
Chr15	120438313	120458136	Con
Chr9	104861592	104894912	Con
Chr5	11255811	11289579	Con
Chr12	3651002	3699378	Con
Chr9	8388306	8408973	Con
Chr10	8287284	8332910	Con
Chr14	121237601	121259003	Con
Chr9	64033300	64067079	Con
Chr2	134510816	134564104	Con
Chr2	49702963	49720096	Con
Chr9	139342253	139361517	Con
Chr2	16206781	16226980	Con
Chr6	64234258	64263371	Con
Chr5	18295258	18306938	Con
Chr6	79919407	79991642	Con
Chr13	32702673	32738896	Con
Chr12	3233818	3297964	Con
Chr7	116740111	116757264	Con
Chr6	52447325	52479235	Con
Chr7	97051396	97120826	Con
Chr12	1388118	1418384	Con
Chr16	71332604	71384581	Con
Chr13	146646309	146682130	Con
Chr6	12372937	12396224	Con
Chr6	13687887	13741980	Con
Chr7	85940805	85964663	Con
Chr7	92279974	92299512	Con
Chr5	387927	401879	Con
Chr5	63928813	63940396	Con
Chr9	134788453	134793813	Con
Chr12	18237537	18251319	Con
Chr14	74861343	74880359	Con
Chr1	272792122	272811865	Con
Chr3	97550001	97568574	Con
Chr4	93413246	93431965	Con
Chr3	8509087	8522546	Con
Chr12	4971072	4986782	Con
Chr17	62711693	62726641	Con
Chr12	20891982	20916404	Con
Chr5	15610391	15620266	Con
Chr2	13629878	13636871	Con
Chr5	3495471	3505297	Con
Chr4	34267652	34283036	Con
Chr12	22076098	22116654	Con
Chr11	7504588	7539038	Con
Chr2	59495568	59537054	Con
Chr2	1350574	1416391	Con
Chr6	84705250	84807938	Con
Chr2	9161242	9192682	Con
Chr6	48060147	48083121	Con
Chr18	19758623	19804748	Con
Chr2	65955469	66065605	Con
Chr4	93907967	93943081	Con
Chr2	6758432	6823691	Con
Chr12	22247337	22293636	Con
Chr15	25331149	25383208	Con
Chr3	1012084	1036950	Con
Chr17	47658667	47683723	Con
Chr4	99306109	99365699	Con
Chr3	4093577	4115232	Con
Chr11	79009101	79027339	Con
Chr3	72324647	72378343	Con
Chr5	9658011	9692163	Con
Chr6	54053576	54070937	Con
Chr12	53350107	53373836	Con
Chr14	28243809	28269775	Con
Chr7	100039523	100085031	Con
Chr7	92225690	92259471	Con
Chr2	7924026	7967147	Con
Chr7	92478145	92518019	Con
Chr14	56606806	56647373	Con
Chr16	51427972	51504036	Con
Chr5	11721757	11747357	Con
Chr14	75148015	75190110	Con
Chr5	7079736	7121745	Con
Chr14	30885808	30928411	Con
Chr2	1296409	1334093	Con
Chr7	92325642	92377717	Con
Chr2	141469137	141524792	Con
Chr14	87645870	87701576	Con
Chr4	695827	722031	Con
Chr2	75212316	75273024	Con
Chr7	98400725	98475015	Con
Chr14	56542373	56592036	Con
Chr2	76494796	76531093	Con
Chr4	93549955	93625155	Con
Chr14	81425259	81538208	Con
Chr6	47495544	47565469	Con
Chr12	24298858	24317213	Con
Chr5	17359846	17445975	Con
Chr1	165103089	165138018	Con
Chr12	27163867	27212364	Con
Chr12	61326689	61360999	Con
Chr2	64727628	64742693	Con
Chr12	47795780	47838267	Con
Chr13	125397179	125419923	Con
Chr3	98251951	98267931	Con
Chr4	94048411	94081521	Con
Chr1	189606245	189638698	Con
Chr15	7502305	7517009	Con
Chr5	3417045	3454284	Con
Chr2	6401736	6416003	Con
Chr6	75000346	75056146	Con
Chr1	163415440	163442403	Con
Chr4	79925290	79982763	Con
Chr13	181322696	181348631	Con
Chr4	79515619	79590294	Con
Chr3	19616187	19642282	Con
Chr1	75011355	75031134	Con
Chr3	113491571	113507316	Con
Chr4	79875247	79891594	Con
Chr6	36152991	36193698	Con
Chr10	14509140	14579864	Con
Chr14	113578611	113630165	Con
Chr6	804594	858190	Con
Chr9	52550405	52602062	Con
Chr2	58790661	58813425	Con
Chr2	144659514	144746485	Con
Chr9	113718215	113769791	Con
Chr14	107041898	107059973	Con
Chr14	65537789	65575402	Con
Chr6	28820417	28836878	Con
Chr6	70902568	70927533	Con
Chr12	61385884	61400326	Con
Chr14	81316941	81333986	Con
Chr13	126528300	126556371	Con
Chr5	78158208	78183669	Con
Chr14	75089055	75120213	Con
Chr2	77235344	77265007	Con
Chr7	76033194	76048367	Con
Chr15	59078931	59103812	Con
Chr9	46511303	46527228	Con
Chr12	34200931	34270297	Con
Chr2	151234588	151287972	Con
Chr2	75976470	76073804	Con
Chr1	109578453	109628652	Con
Chr7	100132427	100144310	Con
Chr7	86150358	86177283	Con
Chr1	77573424	77625526	Con
Chr13	47870817	47992257	Con
Chr9	65099458	65165411	Con
Chr2	5099965	5114713	Con
Chr14	113765148	113799998	Con
Chr6	48585163	48606563	Con
Chr8	120763649	120828878	Con
Chr5	11940851	11961186	Con
Chr7	4542586	4594967	Con
Chr6	118960624	118988624	Con
Chr10	27083234	27158713	Con
Chr5	7009551	7063064	Con
Chr12	45766996	45794535	Con
Chr2	80453356	80482749	Con
Chr1	254147992	254219747	Con
Chr1	189668137	189682281	Con
Chr7	13200705	13242923	Con
Chr5	23120740	23197354	Con
Chr1	108990905	109078005	Con
Chr1	162201291	162268892	Con
Chr12	51937652	51959603	Con
Chr17	51001813	51036987	Con
Chr15	119985374	120021021	Con
Chr6	146223409	146323241	Con
Chr15	79983849	80018011	Con
Chr15	33494645	33581093	Con
Chr9	64331450	64417785	Con
Chr1	71362266	71398101	Con
Chr13	71304496	71339197	Con
Chr2	144903243	144950751	Con
Chr9	6594307	6624791	Con
Chr14	81691637	81823967	Con
Chr1	58176888	58202466	Con
Chr6	68976860	69037464	Con
Chr6	72428076	72487197	Con
Chr12	1433310	1457143	Con
Chr14	99423569	99456645	Con
Chr6	151058915	151125468	Con
Chr8	132884478	132916295	Con
Chr3	9676692	9693418	Con
Chr6	52055309	52062674	Con
Chr5	687851	702198	Con
Chr10	32273246	32299903	Con
Chr14	140719187	140730339	Con
Chr12	22638036	22653584	Con
Chr5	100757816	100789961	Con
Chr12	18146482	18180943	Con
Chr9	52523606	52537419	Con
Chr1	98189428	98217665	Con
Chr7	32326490	32356736	Con
Chr12	61467625	61497455	Con
Chr7	88895068	88951659	Con
Chr8	2923233	2968785	Con
Chr12	22308691	22322922	Con
Chr17	11460362	11511944	Con
Chr12	774558	802544	Con
Chr5	61339628	61354844	Con
Chr14	54715739	54740200	Con
Chr6	63789756	63799515	Con
Chr1	143487949	143534947	Con
Chr2	41388266	41465219	Con
Chr6	159529070	159549602	Con
Chr15	46164870	46196412	Con
Chr9	6229820	6256859	Con
Chr14	40244321	40257912	Con
Chr2	96270775	96294175	Con
Chr3	38063042	38145809	Con
Chr8	104659906	104716408	Con
Chr1	137849553	137965443	Con
Chr1	236268519	236311064	Con
Chr1	236390195	236426014	Con
Chr12	55306013	55356850	Con
Chr4	98109569	98147380	Con
Chr12	35598519	35634503	Con
Chr4	14262620	14298059	Con
Chr6	48623637	48639639	Con
Chr10	24154501	24190808	Con
Chr14	31007903	31040195	Con
Chr4	2352916	2383651	Con
Chr7	38982326	39029676	Con
Chr1	223735089	223756099	Con
Chr3	51447866	51490480	Con
Chr1	271564752	271631711	Con
Chr12	33374749	33419966	Con
Chr2	150848323	150907867	Con
Chr7	45933525	45972183	Con
Chr11	2331228	2355962	Con
Chr16	66877241	66892448	Con
Chr12	58693231	58724392	Con
Chr1	190037224	190058273	Con
Chr12	53076631	53099113	Con
Chr1	4244546	4266333	Con
Chr12	45381250	45417672	Con
Chr1	225704951	225730768	Con
Chr13	61354952	61384054	Con
Chr2	48596122	48605207	Con
Chr2	16589802	16619002	Con
Chr6	1944102	2001005	Con
Chr7	115207509	115271995	Con
Chr6	51798194	51859057	Con
Chr11	22311916	22330734	Con
Chr13	32014361	32074056	Con
Chr17	36920763	36942485	Con
Chr14	51395079	51437896	Con
Chr5	66939498	66975652	Con
Chr9	113869282	113885157	Con
Chr7	29925715	29983477	Con
Chr13	92514088	92555308	Con
Chr15	121416568	121470580	Con
Chr17	46590465	46680825	Con
Chr12	34130833	34185768	Con
Chr16	51332839	51403173	Con
Chr14	134444284	134490739	Con
Chr6	72574349	72598216	Con
Chr13	26167443	26187547	Con
Chr3	9968470	10000561	Con
Chr13	125885039	125921688	Con
Chr2	41743173	41760578	Con
Chr13	125952920	125986739	Con
Chr4	81908016	81936298	Con
Chr3	111432280	111500657	Con
Chr3	58955528	59028151	Con
Chr1	145988577	146010417	Con
Chr3	32160024	32181416	Con
Chr15	139421864	139439710	Con
Chr13	61272491	61336730	Con
Chr2	78755348	78770479	Con
Chr3	39940166	39948089	Con
Chr8	118202274	118205436	Con
Chr17	31901676	31918758	Con
Chr6	52092605	52101659	Con
Chr14	121291350	121295213	Con
Chr6	49653250	49666818	Con
Chr2	65294825	65306868	Con
Chr2	5157655	5163088	Con
Chr9	45912094	45918941	Con
Chr6	52343672	52346637	Con
Chr10	66471879	66476037	Con
Chr2	69922142	69929819	Con
Chr17	35403460	35413975	Con
Chr6	48837414	48844697	Con
Chr6	34947771	34953630	Con
Chr1	273702872	273716103	Con
Chr15	139552095	139561829	Con
Chr6	77163217	77174186	Con
Chr2	69349	72185	Con
Chr2	1255268	1265416	Con
Chr7	112145299	112147991	Con
Chr7	4610208	4613843	Con
Chr15	110376843	110380583	Con
Chr1	269422901	269428790	Con
Chr2	69878281	69882467	Con
Chr12	20375502	20387819	Con
Chr12	52773503	52778384	Con
Chr6	103231845	103235089	Con
Chr7	20906384	20911744	Con
Chr14	56450953	56453938	Con
Chr3	97455257	97464672	Con
Chr14	42106185	42109132	Con
Chr2	98441327	98443528	Con
Chr6	84045789	84055850	Con
Chr15	81934313	81942612	Con
Chr5	19217880	19245099	Con
Chr6	54881243	54884662	Con
Chr3	10027909	10032108	Con
Chr10	39875170	39876055	Con
Chr15	120356018	120361557	Con
Chr2	16145429	16156609	Con
Chr3	97201538	97208887	Con
Chr12	20287448	20296704	Con
Chr7	31347242	31355446	Con
Chr5	21558717	21561399	Con
Chr2	1280100	1287958	Con
Chr7	39219658	39227302	Con
Chr2	151631886	151638160	Con
Chr7	4271113	4275523	Con
Chr1	74625817	74631321	Con
Chr12	48477761	48485986	Con
Chr1	235792750	235794128	Con
Chr1	4946388	4950041	Con
Chr7	38746433	38749863	Con
Chr1	183911826	183918901	Con
Chr3	17940864	17943293	Con
Chr3	18251556	18256546	Con
Chr14	76448285	76464819	Con
Chr18	48708917	48714173	Con
Chr9	46568618	46585742	Con
Chr2	15373367	15386721	Con
Chr2	74774816	74782897	Con
Chr6	92305499	92337634	Con
Chr12	20159813	20171623	Con
Chr6	53980975	53991022	Con
Chr14	56234381	56255510	Con
Chr17	51920417	51942590	Con
Chr4	94781059	94795527	Con
Chr5	63829123	63843384	Con
Chr2	76091905	76110202	Con
Chr14	28759186	28787405	Con
Chr5	21140714	21158658	Con
Chr13	32807666	32819820	Con
Chr2	77202807	77216288	Con
Chr4	98564011	98578792	Con
Chr15	132317911	132327571	Con
Chr2	135337993	135340962	Con
Chr13	87747584	87757989	Con
Chr3	8385514	8403173	Con
Chr12	60203793	60212220	Con
Chr3	3991278	4000832	Con
Chr12	19089093	19103024	Con
Chr9	46156228	46171782	Con
Chr9	64012150	64030157	DN
Chr2	142104937	142109643	DN
Chr9	136526619	136532808	DN
Chr6	27863595	27883236	DN
Chr10	41285342	41298782	DN
Chr15	136840732	136856438	DN
Chr15	79177472	79189872	DN
Chr4	130397397	130410700	DN
Chr11	77349498	77359242	DN
Chr5	8990631	9000471	DN
Chr4	90281206	90294660	DN
Chr10	23547393	23560262	DN
Chr9	41460851	41479418	DN
Chr14	30672323	30679089	DN
Chr18	18026844	18031463	DN
Chr9	41641468	41660938	DN
Chr17	62526972	62534458	DN
Chr2	5431864	5445460	DN
Chr6	67427582	67433166	DN
Chr13	71638320	71655747	DN
Chr3	9836496	9843578	DN
Chr13	34956218	34962767	DN
Chr17	10700251	10705419	DN
Chr3	28834265	28836835	DN
Chr4	98077804	98079906	DN
Chr5	431453	433932	DN
Chr11	78700550	78709031	DN
Chr2	151590951	151594385	DN
Chr13	145361565	145366705	DN
Chr2	151596107	151613694	DN
Chr14	6909916	6913100	DN
Chr17	51724469	51732656	DN
Chr1	242310067	242314397	DN
Chr9	67320646	67326755	DN
Chr14	60404951	60430173	DN
Chr5	78502419	78516653	DN
Chr12	5201665	5220897	DN
Chr12	61127127	61139743	DN
Chr5	7946917	7959636	DN
Chr1	268561099	268575523	DN
Chr5	64117678	64136140	DN
Chr12	61155713	61185145	DN
Chr3	18544795	18566428	DN
Chr12	11675059	11683419	DN
Chr4	110592622	110600302	DN
Chr11	71193202	71203950	DN
Chr7	13122516	13138629	DN
Chr4	42780677	42796795	DN
Chr7	61010024	61032567	DN
Chr6	54230971	54250531	DN
Chr6	93984783	94007751	DN
Chr15	48427273	48443558	DN
Chr10	14602138	14636663	DN
Chr4	102496731	102510027	DN
Chr3	17133498	17135443	DN
Chr17	61897234	61909505	DN
Chr6	39792840	39800817	DN
Chr15	45915100	45927048	DN
Chr2	7309392	7324294	DN
Chr6	986578	998297	DN
Chr2	141301528	141305782	DN
Chr10	32711784	32716531	DN
Chr6	71082845	71089900	DN
Chr2	9064087	9075405	DN
Chr12	24158082	24185575	DN
Chr10	41317749	41322491	DN
Chr4	6920278	6939900	DN
Chr13	146299069	146302061	DN
Chr6	152829939	152834731	DN
Chr13	61525973	61538146	DN
Chr15	63494832	63498436	DN
Chr12	47754738	47757108	DN
Chr6	55329676	55332711	DN
Chr1	219201989	219204465	DN
Chr4	100793602	100796767	DN
Chr1	193915943	193921951	DN
Chr5	16013586	16016579	DN
Chr1	129007266	129023958	DN
Chr12	15002747	15037353	DN
Chr1	241118418	241131262	DN
Chr13	32087104	32097140	DN
Chr1	148969266	148978229	DN
Chr4	18175820	18200204	DN
Chr6	70440620	70450383	DN
Chr4	1095930	1106604	DN
Chr6	27581297	27608971	DN
Chr1	271255520	271288492	DN
Chr14	114473810	114488022	DN
Chr15	29842575	29860545	DN
Chr6	80415914	80439796	DN
Chr10	57881469	57897875	DN
Chr13	3989487	4004973	DN
Chr8	71967270	71985575	DN
Chr11	15032273	15085367	DN
Chr8	116513447	116535836	DN
Chr13	117738600	117776650	DN
Chr4	15804670	15828702	DN
Chr10	64804274	64839183	DN
Chr14	79949111	79968361	DN
Chr7	4435790	4466738	DN
Chr13	202463613	202483337	DN
Chr17	39715396	39733147	DN
Chr8	2081098	2093899	DN
Chr16	38069700	38149267	DN
Chr6	47879722	47905764	DN
Chr3	125273062	125302340	DN
Chr5	59728972	59747440	DN
Chr13	200819914	200837944	DN
Chr6	63841526	63866054	DN
Chr3	96381078	96409491	DN
Chr3	112747267	112765063	DN
Chr4	16503257	16543896	DN
ChrX	88128132	88139012	DN
Chr12	20091572	20103803	DN
Chr4	12098798	12109607	DN
Chr7	89123538	89162170	DN
Chr1	128932324	128982065	DN
Chr1	98359704	98377559	DN
Chr7	89070311	89103940	DN
Chr10	42844820	42908041	DN
Chr8	134939264	134969887	DN
Chr5	8158554	8183907	DN
Chr1	95779894	95824125	DN
ChrX	90169236	90192121	DN
Chr3	53038831	53074333	DN
Chr7	85998207	86033813	DN
Chr13	159004343	159057621	DN
Chr13	21750943	21788305	DN
Chr14	45060788	45082485	DN
Chr9	56847235	56874666	DN
Chr3	111373377	111413035	DN
Chr1	74761256	74774804	DN
Chr3	9380020	9399546	DN
Chr17	58040943	58062760	DN
Chr6	49552175	49585768	DN
Chr17	35364758	35382277	DN
Chr7	23264404	23300785	DN
Chr18	5621781	5648851	DN
Chr2	144766798	144783804	DN
Chr7	30902441	30929881	DN
Chr7	31224575	31265512	DN
Chr6	15931622	15962601	DN
Chr14	61628868	61652886	DN
Chr6	9309072	9325743	DN
Chr11	77419378	77435918	DN
Chr7	112241016	112311877	DN
Chr16	38027767	38052392	DN
Chr3	94568240	94603494	DN
Chr5	3331310	3353576	DN
Chr16	79880134	79892587	DN
Chr6	51207313	51226947	DN
Chr17	41119069	41147147	DN
Chr7	30382928	30419446	DN
Chr8	19689563	19709005	DN
Chr1	165152701	165209734	DN
Chr16	74646672	74693672	DN
Chr14	47957426	48007199	DN
ChrX	107168279	107188203	DN
Chr18	46227531	46264013	DN
Chr6	112055481	112089251	DN
Chr13	34327665	34340206	DN
Chr4	109854021	109877014	DN
Chr13	30750288	30764501	DN
Chr6	48011082	48025768	DN
Chr6	8685242	8702338	DN
Chr8	125289534	125315320	DN
Chr9	125454728	125487478	DN
Chr9	125583978	125603937	DN
Chr10	16303375	16363295	DN
Chr13	69043777	69066765	DN
Chr6	79205533	79256416	DN
Chr1	190342048	190371845	DN
Chr18	18870319	18897659	DN
Chr14	80332158	80369080	DN
Chr17	49271081	49308785	DN
Chr18	29137802	29191908	DN
Chr5	17303835	17346263	DN
Chr6	83419722	83440756	DN
ChrX	34832856	34886334	DN
Chr15	82980560	82997512	DN
Chr9	26926472	26955539	DN
Chr4	14371564	14384860	DN
Chr6	72021939	72058877	DN
Chr13	126362814	126420872	DN
Chr3	45004003	45030204	DN
Chr16	149700	214393	DN
Chr3	87006851	87031145	DN
Chr14	63257288	63291969	DN
Chr17	37957510	37989911	DN
Chr18	19288054	19306533	DN
Chr14	6398213	6419959	DN
Chr2	98364605	98398007	DN
Chr4	68836097	68875861	DN
Chr6	153562202	153590409	DN
Chr6	145177809	145194544	DN
Chr15	75864385	75886407	DN
Chr4	15854505	15871519	DN
Chr12	10217854	10236536	DN
Chr13	16941778	16986703	DN
Chr8	70639390	70670216	DN
Chr1	239366253	239384333	DN
Chr8	96576908	96619771	DN
Chr7	91385140	91404143	DN
Chr9	32822280	32837476	DN
Chr13	68566180	68645051	DN
Chr17	5430923	5494865	DN
Chr4	30697263	30717713	DN
Chr4	40345691	40370368	DN
ChrX	29131339	29178315	DN
Chr13	68674609	68703914	DN
Chr13	69108834	69127742	DN
Chr5	4974866	5012722	DN
Chr16	38236183	38295973	DN
ChrX	92584774	92646460	DN
Chr17	61852692	61876367	DN
Chr3	76870232	76892756	DN
Chr15	46503092	46543138	DN
Chr9	113908446	113927522	DN
Chr3	112312786	112341485	DN
Chr6	100053287	100062717	DN
Chr1	4373794	4399554	DN
Chr6	135162215	135199851	DN
Chr9	97799104	97822244	DN
Chr12	11016489	11036031	DN
Chr9	99773222	99805565	DN
Chr12	55243573	55285806	DN
Chr4	15253606	15274878	DN
Chr3	35253119	35309053	DN
ChrX	17883101	17938600	DN
Chr13	125805371	125863287	DN
Chr9	125676846	125778232	DN
Chr7	26757130	26821805	DN
Chr15	79282298	79335333	DN
Chr8	104733226	104771351	DN
Chr1	223878012	223917264	DN
Chr3	110586393	110620721	DN
Chr5	69916804	69995366	DN
Chr3	78114412	78154453	DN
ChrX	111328062	111346560	DN
Chr17	28029489	28059451	DN
Chr12	60511528	60531855	DN
Chr14	48024888	48050946	DN
Chr1	130763750	130778634	DN
Chr4	85298903	85310543	DN
Chr10	24498755	24517141	DN
Chr9	36223105	36276417	DN
Chr18	33181904	33194509	DN
Chr7	27051904	27102250	DN
Chr6	69388485	69429201	DN
Chr17	35471133	35525717	DN
Chr6	148840428	148916381	DN
Chr1	239400219	239479815	DN
Chr3	93451971	93513876	DN
Chr17	10750684	10798140	DN
Chr8	86209324	86229215	DN
Chr9	45466932	45482293	DN
Chr14	114492654	114514882	DN
Chr7	120703934	120731469	DN
Chr3	56109449	56129977	DN
Chr8	135152554	135185542	DN
Chr12	5251290	5279361	DN
Chr9	105474949	105502160	DN
Chr13	75751738	75769481	DN
Chr9	134651957	134689662	DN
Chr15	81630727	81680730	DN
Chr6	98279630	98325523	DN
Chr2	5233771	5257680	DN
Chr6	135241142	135273853	DN
Chr18	50817561	50829184	DN
Chr3	32444843	32471169	DN
Chr6	70178837	70209567	DN
Chr6	127931856	127955616	DN
Chr2	18390844	18412433	DN
Chr18	50475645	50507372	DN
Chr3	9320650	9366751	DN
Chr6	97293395	97319038	DN
Chr8	75608631	75647562	DN
Chr6	81763412	81799647	DN
Chr9	20367565	20412653	DN
Chr4	11443158	11514342	DN
Chr6	69081229	69105506	DN
Chr2	3235926	3257816	DN
Chr6	77865073	77903038	DN
Chr2	96144086	96195493	DN
Chr4	110715146	110754564	DN
Chr11	47675160	47714142	DN
Chr8	72606395	72650830	DN
Chr14	46808773	46837075	DN
Chr4	101919345	101992575	DN
Chr6	51239809	51274193	DN
Chr4	19000707	19025370	DN
Chr12	20620198	20632148	DN
Chr5	7904260	7930279	DN
Chr1	261542539	261588331	DN
Chr14	47854062	47883498	DN
Chr7	57644312	57683058	DN
Chr16	27237802	27261239	DN
Chr6	151243200	151265860	DN
Chr9	26849321	26874658	DN
Chr6	53334511	53352789	DN
Chr9	124480870	124496289	DN
Chr1	161942573	161980574	DN
Chr1	44577766	44602893	DN
Chr7	30629565	30660854	DN
Chr13	25841016	25865057	DN
Chr3	46970910	46986750	DN
Chr7	39055715	39130933	DN
Chr14	108891526	108946722	DN
Chr3	37822988	37862851	DN
Chr1	145921697	145957793	DN
Chr18	50631310	50679818	DN
Chr1	44640915	44674153	DN
Chr15	82417575	82444503	DN
Chr1	44554941	44565181	DN
Chr1	159014675	159039383	DN
Chr15	128238098	128306560	DN
Chr13	45452031	45477512	DN
Chr5	19407997	19453554	DN
Chr2	9817884	9867867	DN
Chr7	112324730	112414000	DN
Chr6	28641669	28754097	DN
Chr4	2834626	2873715	DN
Chr5	8202180	8289780	DN
Chr7	37847615	37869541	DN
Chr2	90339219	90357396	DN
Chr7	98328008	98363242	DN
Chr14	64307448	64400938	DN
Chr1	10207743	10242581	DN
Chr4	108635438	108674730	DN
Chr13	54865258	54902951	DN
Chr13	145527709	145616289	DN
Chr13	96446464	96464663	DN
Chr1	30528469	30542113	DN
Chr12	47003188	47033508	DN
Chr15	25580811	25605782	DN
Chr14	114758662	114784351	DN
Chr13	28722135	28744524	DN
Chr3	23947461	23992193	DN
Chr14	134353020	134423645	DN
Chr7	11565062	11598763	DN
Chr7	2055656	2066200	DN
Chr8	80921122	80946484	DN
Chr1	147985995	148008011	DN
Chr8	32432932	32460977	DN
Chr1	162492127	162521661	DN
Chr6	51290323	51322174	DN
Chr2	77288712	77315936	DN
Chr5	63054906	63068389	DN
Chr3	9414238	9441987	DN
Chr9	41674774	41800543	DN
Chr14	129516247	129540008	DN
Chr4	100769869	100793095	DN
Chr4	110638343	110660488	DN
Chr6	69658731	69687858	DN
Chr2	139898305	139916547	DN
Chr4	82360904	82391909	DN
Chr18	23789508	23868047	DN
Chr12	33704036	33867126	DN
Chr2	51316594	51337776	DN
Chr2	74318334	74334168	DN
Chr1	43422096	43463329	DN
Chr13	158880031	158910904	DN
Chr2	141965109	141989862	DN
Chr10	24467415	24481272	DN
Chr16	46945674	46964063	DN
Chr6	155739586	155752047	DN
Chr3	86217825	86257389	DN
Chr7	55684422	55729682	DN
Chr13	121543080	121557095	DN
Chr2	88390638	88406843	DN
Chr6	51701811	51717197	DN
Chr2	74035116	74042941	DN
Chr6	157191461	157208218	DN
Chr5	67154863	67190442	DN
Chr6	84400887	84426759	DN
Chr4	105858104	105881219	DN
Chr6	48294936	48322329	DN
Chr4	90342228	90366848	DN
Chr10	11002886	11015122	DN
Chr4	78054020	78092951	DN
Chr6	88424106	88445097	DN
Chr5	21654446	21669827	DN
Chr6	48688149	48706147	DN
Chr14	31910541	31929532	DN
Chr1	77166217	77179434	DN
Chr2	136312493	136326189	DN
Chr11	48031394	48070022	DN
Chr15	84549107	84569042	DN
Chr9	133305036	133337494	DN
Chr15	79066997	79076801	DN
Chr6	47339335	47353621	DN
Chr12	50568676	50612461	DN
Chr15	137493926	137536377	DN
Chr10	10877658	10906333	DN
Chr7	52693009	52737350	DN
Chr3	51417003	51434547	DN
Chr5	9803083	9818091	DN
Chr13	140593200	140618071	DN
Chr1	222675610	222709709	DN
Chr18	37863713	37949469	DN
Chr16	50542844	50557512	DN
Chr6	106615815	106629969	DN
Chr14	89859599	89894534	DN
Chr4	118264605	118294582	DN
Chr7	36879738	36921035	DN
Chr14	43458327	43480888	DN
Chr18	14128216	14152268	DN
Chr12	45809923	45866209	DN
Chr13	99588117	99619406	DN
Chr4	2932901	2964661	DN
Chr6	74880300	74914034	DN
Chr13	65124709	65152047	DN
Chr7	4203506	4217957	DN
Chr17	38345513	38364740	DN
Chr8	6424326	6440363	DN
Chr12	1126616	1142822	DN
Chr2	1001275	1012532	DN
Chr3	40010836	40024170	DN
Chr7	36351742	36378973	DN
Chr13	20956097	20977598	DN
Chr7	67188388	67225188	DN
Chr15	113035191	113059567	DN
Chr4	14481070	14507264	DN
Chr8	67870567	67892706	DN
ChrX	124447705	124464793	DN
Chr12	27091176	27138312	DN
Chr15	46560971	46599747	DN
Chr7	100092133	100113159	DN
Chr15	139341338	139360841	DN
Chr3	42727894	42757612	DN
Chr3	80080415	80115515	DN
Chr13	125544440	125651936	DN
Chr15	46017940	46058672	DN
Chr3	97244411	97288973	DN
Chr6	135460471	135471755	DN
Chr6	47643982	47657678	DN
Chr14	114172430	114194651	DN
Chr2	139862023	139878574	DN
Chr5	77189196	77210289	DN
Chr1	43578617	43609852	DN
Chr15	55818481	55863503	DN
Chr1	94399484	94417684	DN
Chr14	140638409	140663336	DN
Chr17	11296595	11317322	DN
Chr17	43035542	43073315	DN
Chr17	11415735	11443336	DN
Chr9	6432718	6450770	DN
Chr12	50317556	50345694	DN
Chr8	77538304	77579076	DN
Chr1	14210761	14230374	DN
Chr13	126122463	126145037	DN
Chr14	45019025	45047513	DN
Chr13	23860330	23888099	DN
Chr2	71864090	71919686	DN
Chr1	271520926	271538277	DN
Chr2	136833326	136869451	DN
Chr13	4169817	4249750	DN
Chr3	260051	290119	DN
Chr5	76126267	76141175	DN
Chr6	74941240	74972037	DN
Chr13	69996193	70027698	DN
Chr2	46554549	46619409	DN
Chr9	136968106	137043115	DN
Chr5	47689735	47713391	DN
Chr6	18906582	18922140	DN
Chr3	112933385	112961730	DN
Chr4	2982871	2996971	DN
Chr7	93753173	93764144	DN
Chr13	33100685	33126529	DN
Chr14	47899711	47909512	DN
Chr6	3604490	3632056	DN
Chr9	123714125	123751428	DN
Chr5	22551355	22577930	DN
Chr6	103426705	103465797	DN
Chr12	26323349	26335035	DN
Chr13	2514174	2574837	DN
ChrX	88182154	88225695	DN
Chr13	34136015	34148089	DN
Chr6	12552656	12571587	DN
Chr14	113264423	113336181	DN
Chr13	29521731	29531371	DN
Chr14	71282790	71350385	DN
Chr11	78645634	78676106	DN
Chr2	59278909	59335906	DN
Chr10	41004339	41060054	DN
Chr14	106971712	107007779	DN
Chr2	144556454	144638491	DN
Chr3	101812053	101870645	DN
Chr2	59740714	59791868	DN
Chr5	67861486	67901047	DN
Chr1	164999422	165022533	DN
Chr17	51802370	51836319	DN
Chr1	260872663	260887366	DN
Chr6	153072723	153087434	DN
Chr6	28413793	28423847	DN
Chr15	120853429	120872548	DN
Chr15	64794624	64804756	DN
Chr12	13455090	13475283	DN
Chr7	13272824	13299940	DN
Chr8	112324376	112342901	DN
Chr14	43140133	43174108	DN
Chr13	100475639	100507123	DN
Chr5	89911503	89970887	DN
Chr4	15888090	15916781	DN
Chr1	108022645	108044902	DN
Chr12	45930223	45968143	DN
Chr3	48896036	48915580	DN
Chr15	38743038	38761843	DN
Chr3	38180888	38215599	DN
Chr2	48544087	48580262	DN
Chr16	37923088	37955442	DN
Chr4	129377266	129405085	DN
Chr14	103217982	103276246	DN
Chr4	61626181	61715323	DN
Chr6	48658205	48675226	DN
Chr9	136608164	136659056	DN
Chr12	10959336	11003580	DN
Chr6	99222500	99237922	DN
Chr13	200609894	200627615	DN
Chr15	31477645	31526813	DN
Chr9	122682196	122703304	DN
Chr9	85893930	85910245	DN
Chr1	39176790	39211488	DN
Chr9	87666853	87693900	DN
Chr15	509472	581944	DN
Chr3	125048742	125076694	DN
Chr8	125203570	125258124	DN
Chr13	135723790	135772013	DN
Chr2	130604031	130678444	DN
Chr2	142007250	142018871	DN
Chr16	50427186	50494453	DN
Chr11	18061061	18105691	DN
Chr12	20521828	20564774	DN
Chr7	30327525	30367527	DN
Chr8	75539972	75586036	DN
Chr14	123948750	124006163	DN
Chr15	84458950	84502054	DN
Chr5	82624020	82648352	DN
Chr13	10760242	10768460	DN
Chr13	146266357	146280418	DN
Chr10	11089847	11116588	DN
Chr3	125323708	125342836	DN
Chr6	71009399	71028923	DN
Chr16	48869432	48882096	DN
Chr3	112975264	113007990	DN
Chr15	113081601	113106655	DN
Chr15	55989420	56010208	DN
Chr1	22260004	22301190	DN
Chr1	75136613	75167801	DN
Chr15	67152829	67174515	DN
Chr1	30762586	30787320	DN
Chr14	121088620	121143181	DN
Chr6	43998702	44070788	DN
Chr7	112428547	112478269	DN
Chr15	105643988	105660331	DN
Chr15	137274113	137318687	DN
Chr14	30583946	30644431	DN
Chr7	28922432	29012806	DN
Chr8	3947061	3990430	DN
Chr13	71682089	71707872	DN
Chr2	11877737	11900744	DN
Chr2	40813517	40861652	DN
Chr12	6185241	6199725	DN
Chr14	76568172	76589514	DN
Chr6	55278824	55293881	DN
Chr17	5193436	5252120	DN
Chr2	6318353	6330702	DN
Chr5	69775382	69800719	DN
Chr12	49782504	49798118	DN
Chr18	9978406	10000768	DN
Chr2	77734533	77746974	DN
Chr6	118919102	118941615	DN
Chr9	57504855	57545226	DN
Chr5	8081079	8106636	DN
Chr6	46979917	47002512	DN
Chr1	262156628	262202046	DN
Chr10	23605876	23640477	DN
Chr3	71199470	71244430	DN
Chr1	194014535	194034405	DN
Chr14	46851625	46899221	DN
Chr2	78615364	78632655	DN
Chr3	73949224	73970564	DN
Chr7	53647646	53709137	DN
Chr3	69735000	69740827	DN
Chr7	75040114	75048502	DN
Chr7	75888612	75900402	DN
Chr12	52638951	52646647	DN
Chr16	50740390	50757593	DN
Chr17	52878903	52885703	DN
Chr12	54658541	54663819	DN
Chr5	19761055	19762967	DN
Chr2	5464447	5471553	DN
Chr14	51013690	51021020	DN
Chr14	47522234	47529146	DN
Chr17	60042231	60044553	DN
Chr10	32241530	32253037	DN
Chr12	60472892	60475592	DN
Chr2	8898235	8901016	DN
Chr7	36208008	36216564	DN
Chr2	150032667	150036980	DN
Chr7	76403516	76417439	DN
Chr12	6724030	6756099	DN
Chr3	28392631	28421494	DN
Chr12	45878903	45915279	DN
Chr7	49569	89272	DN
Chr10	32436304	32451875	DN
Chr3	58074421	58089270	DN
Chr4	19073985	19108117	DN
Chr16	50510489	50528063	DN
Chr7	51856209	51872471	DN
Chr2	103553047	103593883	DN
Chr13	50546866	50562104	DN
Chr4	83344896	83380032	DN
Chr13	13853174	13888900	DN
Chr14	41717686	41740103	DN
Chr7	40778567	40793576	DN
Chr16	74709455	74729504	DN
Chr7	58663274	58693891	DN
Chr5	70124163	70144558	DN
Chr13	133171443	133183366	DN
Chr5	64378665	64388011	DN
Chr14	21007522	21029650	DN
Chr14	59112575	59124522	DN
Chr12	23399401	23407937	DN
Chr13	92610563	92650321	DN
Chr17	5029116	5062477	DN
Chr7	91346573	91364022	DN
ChrX	62187712	62204947	DN
Chr10	10736234	10744740	DN
Chr16	71764249	71781161	DN
Chr3	48879087	48885183	DN
Chr1	264222860	264232691	DN
Chr3	15081645	15095546	DN
Chr1	109100005	109117472	DN
Chr17	51073799	51084103	DN
Chr7	53722724	53730011	DN
Chr2	41636537	41658557	DN
Chr4	85323496	85330857	DN
Chr9	125513224	125526743	DN
Chr7	53749277	53771621	DN
Chr2	41261556	41321372	DN
Chr4	98008322	98041057	DN
Chr14	77633319	77672916	DN
Chr4	118422583	118435865	DN
Chr2	147325790	147379980	DN
Chr1	248039092	248069906	DN
Chr13	89227380	89253048	DN
Chr1	111381465	111401622	DN
Chr1	110719880	110758073	DN
Chr11	64286008	64305338	DN
Chr7	58739350	58751296	DN
Chr3	26633769	26661514	DN
Chr8	12660355	12682330	DN
Chr18	32063305	32079723	DN
Chr7	86499068	86511928	DN
Chr6	1584621	1622563	DN
Chr1	110865683	110904343	DN
Chr6	153308764	153344253	DN
Chr14	121055882	121075454	DN
Chr7	53222474	53241176	DN
Chr18	43028910	43068679	DN
Chr4	16590556	16609001	DN
Chr14	125141642	125180816	DN
Chr2	15100397	15117597	DN
Chr12	14829975	14858215	DN
Chr8	67905847	67943963	DN
Chr1	162164148	162185789	DN
Chr2	69221541	69239172	DN
Chr2	37249590	37261821	DN
Chr9	8774937	8804804	DN
Chr3	44127953	44145782	DN
Chr6	12584978	12654601	DN
Chr1	180396776	180431947	DN
Chr3	56193821	56219028	DN
Chr14	29450280	29465650	DN
Chr2	144852674	144883628	DN
Chr3	115035373	115052844	DN
Chr13	131749032	131756656	DN
Chr3	28742399	28753318	DN
Chr16	45375092	45449868	DN
Chr6	19881766	19898990	DN
Chr12	17162155	17218464	DN
Chr14	76239873	76281722	DN
Chr1	204414148	204432040	DN
Chr16	38388343	38427811	DN
Chr6	3276896	3308558	DN
Chr15	70331595	70350115	DN
Chr13	120946229	120980041	DN
Chr16	48510654	48573194	DN
Chr14	35111048	35155966	DN
Chr6	69900231	69914264	DN
Chr2	88634365	88658473	DN
Chr4	18463670	18505323	DN
Chr17	37309635	37320564	DN
Chr6	77834540	77850698	DN
Chr10	50971867	51014812	DN
Chr5	64434465	64464720	DN
Chr1	243173197	243199535	DN
Chr1	6941804	6968967	DN
Chr14	31176011	31207857	DN
Chr10	50933708	50958425	DN
Chr13	121939293	121955942	DN
Chr12	11804936	11829050	DN
Chr18	32097804	32118383	DN
Chr15	118864792	118876925	DN
Chr2	80567576	80588526	DN
Chr12	47948785	47959292	DN
Chr6	157777224	157783482	DN
Chr17	27850709	27867250	DN
Chr9	25967694	25976780	DN
Chr1	109199699	109215657	DN
Chr1	261621445	261663798	DN
Chr1	95696101	95737881	DN
Chr13	55041937	55069480	DN
Chr7	95893547	95919073	DN
Chr1	16669298	16702505	DN
Chr9	124306740	124335055	DN
Chr9	20213631	20249661	DN
Chr7	98184778	98197911	DN
Chr4	90223149	90264845	DN
Chr13	54816433	54851223	DN
Chr3	56705121	56748079	DN
Chr1	57598507	57636767	DN
Chr11	67997172	68047891	DN
Chr7	15798243	15826073	DN
Chr7	87157259	87187443	DN
Chr6	69566322	69589377	DN
Chr6	83568514	83584104	DN
Chr13	4020603	4037374	DN
Chr8	76330517	76344664	DN
Chr13	122207465	122234570	DN
Chr9	124554747	124597999	DN
Chr11	66546945	66582982	DN
Chr6	73172246	73190261	DN
Chr13	132605934	132620128	DN
Chr1	167538773	167564525	DN
Chr4	112229623	112239888	DN
Chr1	254784959	254795421	DN
Chr14	131892348	131918846	DN
Chr2	5857334	5882011	DN
Chr5	77486458	77507284	DN
Chr6	8807054	8867340	DN
Chr10	41365617	41410326	DN
Chr14	50723223	50752321	DN
Chr3	115109901	115138263	DN
Chr12	33523114	33559626	DN
Chr6	148936116	148962982	DN
Chr18	44745112	44768739	DN
Chr1	147582553	147604918	DN
Chr5	65970678	65994221	DN
Chr5	68628895	68659645	DN
Chr2	88483076	88502609	DN
Chr7	11712926	11743413	DN
Chr7	9817039	9858459	DN
Chr2	141032140	141062818	DN
Chr6	120044381	120115035	DN
Chr12	5756445	5763118	TS
Chr16	79535957	79551213	TS
Chr6	28092523	28103327	TS
Chr13	22382239	22398635	TS
Chr2	39544739	39559539	TS
Chr2	51068923	51092027	TS
Chr3	40669538	40693525	TS
Chr1	181014872	181035440	TS
Chr12	46862187	46893318	TS
Chr1	86375	108156	TS
Chr1	190149565	190176925	TS
Chr14	73404091	73442230	TS
Chr14	4337692	4347004	TS
Chr8	4379678	4392715	TS
Chr7	121608793	121625260	TS
Chr10	68795254	68824294	TS
Chr5	67582953	67609152	TS
Chr2	68852037	68868845	TS
Chr3	41533826	41556630	TS
Chr3	669816	689705	TS
Chr12	43906393	43927731	TS
Chr15	120051017	120096076	TS
Chr7	57975851	58011801	TS
Chr5	21590199	21606189	TS
Chr10	59990355	60036476	TS
Chr5	19603113	19632375	TS
Chr15	119938551	119954435	TS
Chr17	58995957	59032262	TS
Chr15	48056244	48090643	TS
Chr1	261307306	261350153	TS
Chr2	16560301	16580398	TS
Chr6	3843048	3862887	TS
Chr5	10087564	10101746	TS
Chr5	22448256	22460462	TS
Chr1	131180206	131213190	TS
Chr12	23630282	23652043	TS
Chr2	151197060	151214996	TS
Chr10	14416078	14440208	TS
Chr14	10487194	10501718	TS
Chr10	66059626	66069649	TS
Chr13	75443259	75463763	TS
Chr13	207048984	207060328	TS
Chr3	117670925	117695930	TS
Chr18	51034640	51076932	TS
Chr3	132300827	132334689	TS
Chr5	17463615	17478049	TS
Chr6	53414277	53442631	TS
Chr6	51349747	51378808	TS
Chr1	270846421	270880415	TS
Chr12	60843714	60854094	TS
Chr6	170377903	170401047	TS
Chr7	38488048	38498354	TS
Chr8	368340	380990	TS
Chr2	130235994	130248308	TS
Chr5	69561656	69575886	TS
Chr1	136360240	136371520	TS
Chr11	76919071	76989238	TS
Chr10	65313206	65340630	TS
Chr9	139381530	139412539	TS
Chr16	34722573	34746881	TS
Chr7	37148010	37176928	TS
Chr13	136698240	136712050	TS
Chr17	47453751	47470960	TS
Chr5	34154183	34167908	TS
Chr1	90732470	90748956	TS
Chr13	122537069	122563269	TS
Chr8	41545536	41559564	TS
Chr9	114781121	114797831	TS
Chr1	188540739	188553685	TS
Chr1	890585	923383	TS
Chr1	272758430	272771796	TS
Chr6	103727190	103746564	TS
Chr14	42181412	42211776	TS
Chr11	14284050	14306308	TS
Chr9	57121537	57137482	TS
Chr10	41505364	41522851	TS
Chr2	143144214	143167959	TS
Chr2	62354183	62375756	TS
Chr3	42285767	42314595	TS
Chr2	151155938	151182109	TS
Chr9	47306335	47358616	TS
Chr17	34856266	34885890	TS
Chr14	20739147	20780699	TS
Chr3	42177803	42207487	TS
Chr9	74124523	74154280	TS
Chr18	18646123	18665400	TS
Chr7	121497796	121521647	TS
Chr12	4301716	4319535	TS
Chr14	28712029	28736395	TS
Chr3	52540352	52584341	TS
Chr12	48171427	48210555	TS
Chr14	41963555	41992362	TS
Chr14	124705185	124736148	TS
Chr2	33125272	33154721	TS
Chr3	118125496	118142208	TS
Chr1	34126014	34166731	TS
Chr2	6900932	6938805	TS
Chr1	137464892	137492596	TS
Chr5	6117997	6156859	TS
Chr8	29582859	29638029	TS
Chr1	78215446	78221310	TS
Chr4	44599179	44607803	TS
Chr9	74081315	74087371	TS
Chr1	273895008	273918882	TS
Chr1	254228832	254236574	TS
Chr14	49230794	49246442	TS
Chr12	44050874	44061378	TS
Chr6	77232391	77259373	TS
Chr1	265094591	265103244	TS
Chr1	273807287	273874776	TS
Chr18	18564905	18574988	TS
Chr1	274053484	274064057	TS
Chr18	18545164	18550076	TS
Chr18	18349059	18369840	TS
Chr17	34417086	34426825	TS
Chr3	73184913	73195266	TS
Chr17	35218275	35235310	TS
Chr9	114736150	114744998	TS
Chr16	3857972	3880688	TS
Chr18	18426389	18439998	TS
Chr7	29390001	29409666	TS
Chr9	46790259	46805733	TS
Chr15	33460510	33480453	TS
Chr8	75306079	75336922	TS
Chr1	208626668	208636253	TS
Chr16	27354667	27377180	TS
Chr1	14918183	14930219	TS
Chr13	38843813	38854004	TS
Chr6	150828227	150846648	TS
Chr12	18350124	18357573	TS
Chr3	4135272	4154893	TS
Chr1	111592314	111607024	TS
Chr10	43297397	43309223	TS
Chr3	8702472	8714686	TS
Chr18	45450370	45475897	TS
Chr3	53176607	53188846	TS
Chr18	9186896	9197995	TS
Chr6	103761342	103781600	TS
Chr1	188476590	188495304	TS
Chr2	1847067	1868251	TS
Chr17	49354950	49362415	TS
Chr7	20839548	20850265	TS
Chr2	62329204	62341015	TS
Chr14	137659134	137664478	TS
Chr13	67720236	67731214	TS
Chr9	53454024	53465637	TS
Chr3	75615585	75620960	TS
Chr7	20880575	20888525	TS
Chr9	640644	652403	TS
Chr6	63587560	63591524	TS
Chr1	236930551	236944070	TS
Chr8	23455100	23461512	TS
Chr1	273782150	273793966	TS
Chr5	87313172	87317943	TS
Chr8	112038497	112044205	TS
Chr13	122577179	122592014	TS
Chr2	120638263	120652863	TS
Chr8	1601069	1616989	TS
Chr1	265594356	265609257	TS
Chr2	58439255	58460478	TS
Chr6	47128422	47142569	TS
Chr5	18322279	18329875	TS
Chr1	269642111	269655927	TS
Chr1	268321775	268331920	TS
Chr5	63784637	63798226	TS
Chr5	6985694	6993373	TS
Chr1	273934536	273944652	TS
Chr12	26406047	26416773	TS
Chr12	26445849	26463318	TS
Chr13	208287625	208297777	TS
Chr6	59342423	59352417	TS
Chr17	40077044	40098195	TS
Chr18	18489763	18501209	TS
Chr14	41448888	41456716	TS
Chr5	21279345	21293318	TS
Chr1	269711368	269728417	TS
Chr13	75492169	75501993	TS
Chr3	39857802	39867643	TS
Chr3	97415807	97431525	TS
Chr7	57936720	57958524	TS
Chr3	97506575	97533780	TS
Chr9	9771046	9785792	TS
Chr5	19549215	19571040	TS
Chr7	76168141	76195743	TS
Chr3	97305907	97382108	TS
Chr12	26350162	26391337	TS
Chr14	28620893	28677409	TS
Chr7	31578468	31582593	TS
Chr13	206397886	206408582	TS
Chr1	165053936	165063407	TS
Chr1	165079101	165089506	TS
Chr1	273624607	273628028	TS
Chr9	75262757	75274182	TS
Chr13	206525699	206537826	TS
Chr13	206579730	206592655	TS
Chr14	6479288	6495137	TS
Chr17	62626261	62632554	TS
Chr3	97150689	97175833	TS
Chr10	66133411	66150157	TS
Chr13	70835071	70853671	TS
Chr12	48269344	48278154	TS
Chr14	113653683	113669725	TS
Chr6	49306422	49329426	TS
Chr11	77065512	77089615	TS
Chr2	4617368	4651909	TS
Chr6	69792888	69811023	TS
Chr17	26269428	26295369	TS
Chr7	57608880	57637066	TS
Chr15	59664760	59696127	TS
Chr1	7438742	7465527	TS
Chr10	27352251	27378788	TS
Chr13	206121908	206155194	TS
Chr6	146175183	146190435	TS
Chr6	95443798	95475690	TS
Chr14	133948539	133965072	TS
Chr10	23843976	23860956	TS
Chr12	14704400	14727975	TS
Chr14	112079100	112094524	TS
Chr18	6859285	6868828	TS
Chr5	22415230	22428087	TS
Chr12	1608535	1622859	TS
Chr2	1813875	1827759	TS
Chr16	51741849	51755760	TS
Chr3	37996159	38017990	TS
Chr3	39577753	39595566	TS
Chr2	1948956	1969265	TS
Chr15	137128061	137157535	TS
Chr12	146502	162485	TS
Chr6	52538133	52553546	TS
Chr14	137145840	137170033	TS
Chr13	84633444	84643485	TS
Chr6	63634093	63645030	TS
Chr3	8403698	8415258	TS
Chr4	122444877	122469496	TS
Chr1	268680739	268692312	TS
Chr4	122562262	122578681	TS
Chr1	267569803	267588051	TS
Chr8	19791058	19820449	TS
Chr13	54206989	54229562	TS
Chr2	1744551	1764985	TS
Chr4	90102853	90128834	TS
Chr9	46821725	46843351	TS
Chr1	208686362	208704446	TS
Chr5	34238799	34269112	TS
Chr15	17623235	17641351	TS
Chr17	59509993	59528928	TS
Chr8	1570506	1591413	TS
Chr9	17149540	17196363	TS
Chr14	138068938	138093942	TS
Chr10	41853753	41880731	TS
Chr2	87637104	87657801	TS
Chr9	57362839	57385621	TS
Chr17	1504107	1523588	TS
Chr11	14362487	14392796	TS
Chr13	124001046	124026783	TS
Chr7	56378297	56412259	TS
Chr2	9275325	9293696	TS
Chr6	92429094	92444958	TS
Chr9	20735493	20747054	TS
Chr1	168968455	168982269	TS
Chr14	123439438	123460437	TS
Chr4	125241177	125268543	TS
Chr2	138202337	138233311	TS
Chr9	10444430	10477294	TS
Chr9	9565711	9605447	TS
Chr7	86967054	86987310	TS
Chr13	16836782	16908562	TS
Chr2	84594803	84625064	TS
Chr3	42414667	42442901	TS
Chr1	136239111	136284728	TS
Chr4	104051254	104111484	TS
Chr7	91819554	91863599	TS
Chr1	271320364	271339441	TS
Chr13	139858015	139882119	TS
Chr7	52611429	52632608	TS
Chr10	11711319	11743742	TS
Chr6	95233224	95252030	TS
Chr8	82940881	82971707	TS
Chr7	88266318	88292140	TS
Chr6	77403891	77450369	TS
Chr1	14018226	14039456	TS
Chr10	11640884	11681028	TS
Chr11	67806703	67836008	TS
Chr7	46369164	46403878	TS
Chr11	46057760	46074969	TS
Chr6	89581474	89600128	TS
Chr12	22049566	22062264	TS
Chr1	188416582	188459929	TS
Chr1	98522857	98545050	TS
Chr14	45120398	45142656	TS
Chr4	129336177	129358822	TS
Chr6	32036418	32056022	TS
Chr14	80036068	80060914	TS
Chr1	236670175	236683820	TS
Chr16	48697673	48733269	TS
Chr10	33304216	33354682	TS
Chr14	81842363	81877122	TS
Chr6	84619266	84645670	TS
Chr17	54871071	54897745	TS
Chr3	10277871	10299319	TS
Chr2	11918626	11931076	TS
Chr7	57577861	57591288	TS
Chr2	15184957	15196234	TS
Chr10	41693953	41705116	TS
Chr10	42248705	42262025	TS
Chr7	31462885	31484159	TS
Chr11	76821341	76833086	TS
Chr1	223785318	223813591	TS
Chr13	124992028	125012554	TS
Chr9	130827985	130846722	TS
Chr3	3505128	3528411	TS
Chr1	74647152	74678041	TS
Chr10	42351005	42374411	TS
Chr16	5789955	5824947	TS
Chr15	136392297	136414217	TS
Chr9	130912704	130942420	TS
Chr4	15379627	15407423	TS
Chr9	126622521	126659348	TS
Chr13	123565391	123593714	TS
Chr14	62699286	62726462	TS
Chr2	40188918	40229304	TS
Chr12	47718526	47734560	TS
Chr13	33050130	33091402	TS
Chr2	7983553	8018060	TS
Chr7	55750941	55786927	TS
Chr1	90519649	90572124	TS
Chr6	53245325	53268830	TS
Chr2	51111528	51122709	TS
Chr9	118190487	118221221	TS
Chr13	131260299	131271871	TS
Chr12	59910493	59937809	TS
Chr16	46471205	46505253	TS
Chr13	68982780	69013261	TS
Chr1	109492117	109515628	TS
Chr14	114622087	114644733	TS
Chr12	17989705	18030102	TS
ChrX	97293150	97312817	TS
Chr9	52350148	52359136	TS
Chr2	59377128	59409756	TS
Chr6	69823981	69859112	TS
Chr2	150456033	150471734	TS
Chr8	703901	719111	TS
Chr2	73081757	73110556	TS
Chr9	134593822	134610225	TS
Chr5	74693226	74714224	TS
Chr1	109532154	109562998	TS
Chr8	56289714	56325494	TS
Chr6	158002256	158034313	TS
Chr7	111204369	111224868	TS
Chr7	64538470	64577376	TS
Chr3	18056368	18066948	TS
Chr5	12218572	12247076	TS
Chr11	6420870	6441094	TS
Chr2	26590460	26616563	TS
Chr15	110348242	110363596	TS
Chr3	113550864	113562241	TS
Chr14	131717924	131756736	TS
Chr2	9217811	9232163	TS
Chr8	2811004	2844923	TS
Chr6	70378176	70388090	TS
Chr15	138550925	138578518	TS
Chr8	77291744	77303567	TS
Chr3	3565456	3617845	TS
Chr14	134003817	134054132	TS
Chr17	61729162	61759703	TS
Chr13	115597726	115645932	TS
Chr6	63926750	63964016	TS
Chr1	10106555	10154474	TS
Chr6	5791535	5825935	TS
Chr7	4348343	4388582	TS
Chr3	118431755	118448931	TS
Chr2	88546475	88566044	TS
Chr14	114681702	114710520	TS
Chr6	81409817	81427234	TS
Chr3	37877455	37890248	TS
Chr8	71895661	71904664	TS
Chr1	4890806	4906683	TS
Chr6	88457180	88476929	TS
Chr17	57813833	57830184	TS
Chr13	21066285	21084703	TS
Chr7	89002629	89018188	TS
Chr4	1026659	1062583	TS
Chr7	57159676	57178467	TS
Chr14	46219889	46251747	TS
ChrX	124289886	124323331	TS
Chr11	13965534	13982852	TS
Chr7	38930588	38948943	TS
Chr2	119588337	119609562	TS
Chr6	74777083	74799647	TS
ChrX	111883495	111904152	TS
Chr4	98825539	98838598	TS
Chr4	39102376	39114047	TS
Chr6	71160523	71193042	TS
Chr11	76641719	76656416	TS
Chr11	76709723	76731054	TS
Chr4	80130619	80156314	TS
Chr3	30976611	30999344	TS
Chr6	80792212	80817238	TS
Chr10	8351416	8379398	TS
Chr1	270403056	270429825	TS
Chr10	63715464	63774243	TS
Chr13	135548756	135580381	TS
Chr6	55104707	55141891	TS
Chr1	240638525	240671047	TS
Chr10	11592187	11627999	TS
Chr16	6100423	6140330	TS
Chr7	28553791	28581642	TS
Chr9	57453807	57482049	TS
Chr18	11561551	11605829	TS
Chr11	9537788	9563309	TS
Chr3	58708656	58750384	TS
Chr2	6648262	6678535	TS
Chr6	70857107	70888252	TS
Chr13	198378359	198403649	TS
Chr16	51276314	51312867	TS
Chr12	18090278	18123471	TS
Chr15	136873420	136910249	TS
Chr1	202551940	202591205	TS
Chr3	96988021	97026212	TS
Chr3	8474445	8496700	TS
Chr1	269216297	269238123	TS
Chr3	86643041	86658859	TS
Chr6	54669499	54687018	TS
Chr8	2673788	2685715	TS
Chr3	8843170	8871223	TS
Chr14	1458923	1493113	TS
Chr13	32156857	32180238	TS
Chr3	132365130	132378531	TS
Chr12	4355183	4377262	TS
Chr16	45622111	45671118	TS
Chr4	122697169	122725802	TS
Chr13	90936798	90956140	TS
Chr2	61279507	61306237	TS
Chr5	10583772	10608683	TS
