# Supplementary material for: Analyzing super-enhancer temporal dynamics reveals potential critical enhancers and their gene regulatory networks underlying skeletal muscle development
Source: HighWire-hosted journal article supplement (doi:10.1101/gr.278344.123), 2024-10-21
Supplement: Supplemental_Tables_S4.xlsx [file Supplemental_Tables_S4.xlsx]

## Sheet: Supplemental_Table_S4
Supplemental Table S4. Identification of regulatory SNPs by STARR-Seq
SNP	Candidate critical enhancer	Pattern	ref	alt	FC_rep1	FDR_rep1	FC_rep2	FDR_rep2
Chr1_189633129	Chr1_189631409_189633032	Con	T	A	0.542268	1.23265e-14	0.403093	8.40006e-29
Chr2_6775311	Chr2_6775629_6776913	Con	C	T	0.0415184	1.00926e-06	0.0735469	1.87511e-06
Chr2_6777241	Chr2_6775629_6776913	Con	G	A	0.462451	1.1779e-20	0.503557	1.10101e-17
Chr2_6785466	Chr2_6785419_6786598	Con	C	T	0.127055	2.68888e-14	0.122197	1.26477e-13
Chr2_6792356	Chr2_6792267_6792461	Con	C	T	0.661094	1.78319e-20	0.65316	1.42175e-21
Chr2_6792360	Chr2_6792267_6792461	Con	C	A	0.537964	7.52586e-37	0.465274	3.60843e-51
Chr2_6792362	Chr2_6792267_6792461	Con	G	A	0.533333	1.04179e-37	0.459618	3.95351e-52
Chr2_6792442	Chr2_6792267_6792461	Con	G	A	0.442503	9.99839e-32	0.382733	9.19543e-43
Chr2_6792460	Chr2_6792267_6792461	Con	A	G	0.534541	2.80215e-21	0.404762	4.43782e-40
Chr2_6813383	Chr2_6813039_6814713	Con	G	A	1.94172	3.16546e-90	1.91037	1.35818e-84
Chr2_6813396	Chr2_6813039_6814713	Con	C	T	0.516523	2.64649e-34	0.460842	6.03601e-44
Chr2_6816061	Chr2_6815336_6816037	Con	C	T	0.535161	9.5605e-31	0.632896	2.86954e-19
Chr2_6816212	Chr2_6815336_6816037	Con	A	G	0.538381	1.17876e-09	0.561164	7.18805e-09
Chr2_41428684	Chr2_41428824_41430650	Con	C	T	0.446377	1.55743e-12	0.657971	6.74837e-05
Chr2_75993411	Chr2_75993518_75995229	Con	G	A	0.53252	0.000982517	0.390244	3.20257e-06
Chr2_76002068	Chr2_76002248_76003232	Con	C	T	0.36226	1.01756e-23	0.521899	2.98934e-14
Chr2_76022986	Chr2_76021931_76023010	Con	C	T	0.44	0.000299444	0.188571	7.59694e-10
Chr7_32348525	Chr7_32346988_32348164	Con	G	A	0.351931	0.00022589	0.424893	0.000778182
Chr7_86162783	Chr7_86162944_86164792	Con	G	A	0.605182	9.38677e-25	0.62877	1.58607e-22
Chr7_115264719	Chr7_115263975_115264323	Con	C	T	0.101018	1.24291e-09	0.0382146	2.52931e-14
Chr7_115265109	Chr7_115265301_115266080	Con	G	A	6.02381	9.76574e-19	3.28571	2.43977e-06
Chr7_115265780	Chr7_115265301_115266080	Con	T	C	0.516005	6.3626e-10	0.574904	7.10498e-08
Chr7_115265781	Chr7_115265301_115266080	Con	G	A	0.524611	1.28322e-09	0.59715	5.31759e-07
Chr7_115270391	Chr7_115270468_115271916	Con	A	G	0.246901	3.26585e-18	0.306302	5.58178e-17
Chr7_115271430	Chr7_115270468_115271916	Con	G	T	0.488308	2.28378e-10	0.513067	1.17202e-09
Chr7_115271849	Chr7_115270468_115271916	Con	C	T	1.75794	1.25365e-05	1.91667	2.17837e-07
Chr12_34231267	Chr12_34230720_34231974	Con	C	T	0.61354	9.5874e-07	0.610719	1.08295e-06
Chr12_34231458	Chr12_34230720_34231974	Con	T	A	0.528139	2.26231e-14	0.621212	5.25102e-09
Chr12_53350953	Chr12_53349534_53350468	Con	C	T	0.632099	0.00861675	0.455556	2.92676e-05
Chr14_81317527	Chr14_81316949_81318288	Con	A	G	0.383459	0.000120805	0.263158	6.05984e-07
Chr16_51437179	Chr16_51435326_51437061	Con	T	C	0.641835	9.2954e-09	0.497475	7.38378e-18
Chr16_51450297	Chr16_51450236_51450530	Con	C	T	2.14706	7.44583e-27	1.81046	2.74001e-14
Chr17_51938697	Chr17_51938393_51939194	Con	C	T	1.53733	1.00295e-08	1.64075	1.06952e-11
Chr17_51939550	Chr17_51939416_51940052	Con	G	A	0.490672	1.11192e-20	0.56592	3.04023e-14
Chr3_110587026	Chr3_110586352_110586980	DN	G	A	2.55556	0.00154254	2.31481	0.00675392
Chr3_110587030	Chr3_110586352_110586980	DN	C	T	2.50847	0.00232166	2.27119	0.00713755
Chr3_112944260	Chr3_112944356_112944705	DN	G	C	8.18447	6.88769e-09	7.49515	5.47806e-09
Chr3_112957025	Chr3_112957380_112958014	DN	A	G	0.149286	1.46624e-40	0.182217	6.09845e-37
Chr4_110592513	Chr4_110592710_110594151	DN	C	T	0.26992	6.01402e-21	0.283508	7.32284e-21
Chr6_3617169	Chr6_3617560_3619542	DN	C	T	0.362256	3.27344e-23	0.364425	2.30258e-23
Chr6_3617662	Chr6_3617560_3619542	DN	A	G	1.734	5.75931e-53	1.61837	2.29233e-38
Chr7_57654613	Chr7_57653490_57655415	DN	C	T	0.510324	1.4697e-07	0.589971	4.64133e-05
Chr7_57676526	Chr7_57675524_57677125	DN	C	T	0.479515	1.33546e-22	0.496249	3.42174e-20
Chr7_57676549	Chr7_57675524_57677125	DN	C	A	0.630223	1.87919e-07	0.512307	1.05347e-12
Chr13_131756433	Chr13_131756099_131756781	DN	C	T	0.351351	1.11855e-06	0.55774	0.00196412
Chr13_131756700	Chr13_131756099_131756781	DN	C	A	0.433792	1.33651e-18	0.400688	2.75172e-20
Chr15_81658491	Chr15_81657807_81658898	DN	C	T	0.481361	9.29024e-10	0.510535	1.50507e-08
Chr15_81658882	Chr15_81657807_81658898	DN	C	T	0.244186	1.85025e-09	0.177326	4.68327e-12
Chr15_81659082	Chr15_81657807_81658898	DN	C	T	0.338346	8.17051e-05	0.496241	0.0048992
Chr1_208628469	Chr1_208628104_208629260	TS	C	T	1.58511	6.40289e-05	1.75266	3.97586e-07
Chr1_208628648	Chr1_208628104_208629260	TS	T	A	1.55372	0.000396964	1.69697	6.70753e-06
Chr6_71160313	Chr6_71160532_71161325	TS	G	C	0.567705	9.09285e-13	0.560596	7.68462e-14
Chr6_71174434	Chr6_71171488_71174984	TS	G	C	0.470405	4.7245e-11	0.531153	4.66641e-08
Chr7_57578692	Chr7_57577829_57579711	TS	C	T	0.315217	1.25327e-08	0.57971	0.00270556
Chr10_42259626	Chr10_42260034_42262062	TS	T	C	0.3879	0.00308032	0.302491	0.000511466
