# Supplementary material for: Analyzing super-enhancer temporal dynamics reveals potential critical enhancers and their gene regulatory networks underlying skeletal muscle development
Source: HighWire-hosted journal article supplement (doi:10.1101/gr.278344.123), 2024-10-21
Supplement: Supplemental_Tables_S5.xlsx [file Supplemental_Tables_S5.xlsx]

## Sheet: Supplemental_Table_S5
Supplemental Table S5. The TF binding motifs disrupted by regulatory SNPs
Regulatory SNP	ref	alt	TF symbol	alleleDiff	effect
Chr2:6777241:G:A	G	A	KLF15	0.933449	strong
Chr2:6813396:C:T	C	T	MYF6	1.61566	strong
Chr2:6816212:A:G	A	G	RXRA	1.89848	strong
Chr2:6816212:A:G	A	G	RXRB	1.01665	strong
Chr7:32348525:G:A	G	A	BCL6	0.434083	weak
Chr12:34231458:T:A	T	A	ETS1	1.44862	strong
Chr12:34231458:T:A	T	A	ETS1	1.44862	strong
Chr12:34231458:T:A	T	A	ETS1	1.44862	strong
Chr16:51450297:C:T	C	T	MEIS2	1.19749	strong
Chr16:51450297:C:T	C	T	MEIS3	1.4832	strong
Chr16:51450297:C:T	C	T	PKNOX2	1.99066	strong
Chr17:51938697:C:T	C	T	ESRRA	1.17733	strong
Chr17:51938697:C:T	C	T	ESRRA	1.17754	strong
Chr17:51938697:C:T	C	T	ESRRA	1.17754	strong
Chr17:51938697:C:T	C	T	NR4A3	0.529372	weak
Chr17:51938697:C:T	C	T	REST	1.42722	strong
Chr17:51938697:C:T	C	T	RXRA	1.06377	strong
Chr17:51938697:C:T	C	T	RXRG	1.0395	strong
Chr17:51939550:G:A	G	A	NR1D1	1.58085	strong
Chr7:57578692:C:T	C	T	TEAD4	0.924861	strong
Chr7:57654613:C:T	C	T	MTF1	1.77031	strong
Chr7:57676549:C:A	C	A	KLF4	1.77308	strong
Chr7:57676549:C:A	C	A	KLF4	1.77308	strong
Chr7:57676549:C:A	C	A	KLF4	1.77308	strong
Chr7:57676549:C:A	C	A	KLF4	1.77308	strong
Chr7:57676549:C:A	C	A	SP1	0.99317	strong
Chr6:71174434:G:C	G	C	E2F2	1.29254	strong
Chr2:75993411:G:A	G	A	PRDM1	0.507206	weak
Chr2:76022986:C:T	C	T	CXXC1	0.474899	weak
Chr2:76022986:C:T	C	T	IRX3	1.98732	strong
Chr14:81317527:A:G	A	G	NFATC2	1.70719	strong
Chr14:81317527:A:G	A	G	NFATC2	1.70719	strong
Chr15:81658882:C:T	C	T	SOX10	1.99565	strong
Chr15:81658882:C:T	C	T	SPI1	0.663781	weak
Chr15:81658882:C:T	C	T	SPIC	1.41646	strong
Chr15:81659082:C:T	C	T	SMAD4	1.98797	strong
Chr7:86162783:G:A	G	A	ESRRA	1.84535	strong
Chr7:86162783:G:A	G	A	ESRRA	1.84535	strong
Chr7:86162783:G:A	G	A	ESRRA	1.84493	strong
Chr7:86162783:G:A	G	A	NR1I3	1.75889	strong
Chr7:86162783:G:A	G	A	NR6A1	0.71822	strong
Chr3:112957025:A:G	A	G	SOX17	1.84744	strong
Chr3:112957025:A:G	A	G	TCF3	1.99912	strong
Chr3:112957025:A:G	A	G	TCF3	1.99912	strong
Chr3:112957025:A:G	A	G	TCF3	1.99912	strong
Chr3:112957025:A:G	A	G	TCF3	1.63915	strong
Chr7:115264719:C:T	C	T	BACH1	1.29254	strong
Chr7:115270391:A:G	A	G	CEBPZ	1.70719	strong
Chr7:115270391:A:G	A	G	NFYA	1.84824	strong
Chr7:115270391:A:G	A	G	NFYA	1.91739	strong
Chr7:115270391:A:G	A	G	NFYA	1.91739	strong
Chr7:115270391:A:G	A	G	NFYA	1.91739	strong
Chr7:115270391:A:G	A	G	NFYB	1.86418	strong
Chr7:115270391:A:G	A	G	NFYC	1.46229	strong
Chr7:115270391:A:G	A	G	PBX3	1.18233	strong
Chr7:115271430:G:T	G	T	STAT3	1.11282	strong
Chr7:115271430:G:T	G	T	STAT3	1.11282	strong
Chr7:115271430:G:T	G	T	STAT3	1.11282	strong
Chr1:189633129:T:A	T	A	MEF2C	1.95621	strong
Chr1:208628648:T:A	T	A	RUNX1	1.66808	strong
Chr1:208628648:T:A	T	A	RUNX1	1.66808	strong
Chr1:208628648:T:A	T	A	RUNX1	1.66808	strong
Chr1:208628648:T:A	T	A	RUNX1	1.66808	strong
The "alleleDiff" value computed by the motifbreakR software represents the impact of a single nucleotide variation (SNV) on a transcription factor binding site.
