# Supplementary material for: Analyzing super-enhancer temporal dynamics reveals potential critical enhancers and their gene regulatory networks underlying skeletal muscle development
Source: HighWire-hosted journal article supplement (doi:10.1101/gr.278344.123), 2024-10-21
Supplement: Supplemental_Tables_S6.xlsx [file Supplemental_Tables_S6.xlsx]

## Sheet: Supplemental_Table_S6
Supplemental Table S6. TFs/eRNAs/targets regulatory network mediated by candidate critical enhancers
TF	Candidate_critical_enhancer	Temporal pattern	Target	TF_target_Rs	TF_target_fdr	eRNA_target_Rs	eRNA_target_fdr
MYOG	Chr1_189631409_189633032	Con	TRMT5	0.383394	0.0483722	0.422466	0.028144
TCF12	Chr1_189631409_189633032	Con	TRMT5	0.490842	0.00933205	0.422466	0.028144
ESRRB	Chr12_34230720_34231974	Con	CUEDC1	0.434066	0.0236844	0.559219	0.00242574
ESRRB	Chr12_34230720_34231974	Con	AKAP1	0.42735	0.0261901	0.421856	0.0283964
MYF5	Chr12_34230720_34231974	Con	SRSF1	0.855311	1.32256e-08	0.606838	0.00079064
MYF5	Chr12_34230720_34231974	Con	AKAP1	0.608669	0.000754594	0.421856	0.0283964
MYOD1	Chr12_34230720_34231974	Con	AKAP1	0.391941	0.0431829	0.421856	0.0283964
MYOG	Chr12_34230720_34231974	Con	SRSF1	0.664225	0.000157959	0.606838	0.00079064
MYOG	Chr12_34230720_34231974	Con	AKAP1	0.747253	7.52021e-06	0.421856	0.0283964
NF1	Chr12_34230720_34231974	Con	SRSF1	0.625153	0.000489362	0.606838	0.00079064
NF1	Chr12_34230720_34231974	Con	AKAP1	0.449328	0.01871	0.421856	0.0283964
TCF12	Chr12_34230720_34231974	Con	SRSF1	0.656899	0.000197653	0.606838	0.00079064
TCF12	Chr12_34230720_34231974	Con	AKAP1	0.462149	0.0152258	0.421856	0.0283964
TCF4	Chr12_34230720_34231974	Con	SRSF1	0.542125	0.00348815	0.606838	0.00079064
TCF4	Chr12_34230720_34231974	Con	AKAP1	0.528694	0.00458047	0.421856	0.0283964
TGIF2	Chr12_34230720_34231974	Con	SRSF1	0.476801	0.0119182	0.606838	0.00079064
TGIF2	Chr12_34230720_34231974	Con	AKAP1	0.452381	0.0178263	0.421856	0.0283964
CTCF	Chr12_53349534_53350468	Con	EFNB3	0.632479	0.000400501	0.460628	0.0156089
CTCF	Chr12_53349534_53350468	Con	CNTROB	0.603175	0.000867248	0.446547	0.0195462
CTCF	Chr12_53349534_53350468	Con	ENSSSCG00000026818	0.669719	0.000132981	0.39626	0.040734
MYF5	Chr12_53349534_53350468	Con	EFNB3	0.909035	5.40512e-11	0.460628	0.0156089
MYF5	Chr12_53349534_53350468	Con	CNTROB	0.871184	3.38536e-09	0.446547	0.0195462
MYF5	Chr12_53349534_53350468	Con	ENSSSCG00000026818	0.946276	9.18154e-14	0.39626	0.040734
MYOG	Chr12_53349534_53350468	Con	EFNB3	0.777778	1.80348e-06	0.460628	0.0156089
MYOG	Chr12_53349534_53350468	Con	CNTROB	0.838217	4.84511e-08	0.446547	0.0195462
MYOG	Chr12_53349534_53350468	Con	ENSSSCG00000026818	0.788156	1.05423e-06	0.39626	0.040734
TCF12	Chr12_53349534_53350468	Con	EFNB3	0.64652	0.00026884	0.460628	0.0156089
TCF12	Chr12_53349534_53350468	Con	CNTROB	0.493284	0.00893423	0.446547	0.0195462
TCF12	Chr12_53349534_53350468	Con	ENSSSCG00000026818	0.648352	0.000254846	0.39626	0.040734
TCF4	Chr12_53349534_53350468	Con	EFNB3	0.712454	3.05819e-05	0.460628	0.0156089
TCF4	Chr12_53349534_53350468	Con	CNTROB	0.683761	8.42604e-05	0.446547	0.0195462
TCF4	Chr12_53349534_53350468	Con	ENSSSCG00000026818	0.714896	2.78998e-05	0.39626	0.040734
TGIF2	Chr12_53349534_53350468	Con	EFNB3	0.626374	0.000473454	0.460628	0.0156089
TGIF2	Chr12_53349534_53350468	Con	CNTROB	0.594017	0.0010876	0.446547	0.0195462
TGIF2	Chr12_53349534_53350468	Con	ENSSSCG00000026818	0.581197	0.00147678	0.39626	0.040734
ATF3	Chr14_81316949_81318288	Con	ZMIZ1	0.408425	0.0344257	0.58547	0.00133549
ATF3	Chr14_81316949_81318288	Con	PPIF	0.535409	0.0040027	0.797924	6.1868e-07
ATF3	Chr14_81316949_81318288	Con	ANXA11	0.607448	0.000778462	0.733822	1.32542e-05
ATF3	Chr14_81316949_81318288	Con	ZCCHC24	0.522589	0.00516572	0.543956	0.00335804
FOS	Chr14_81316949_81318288	Con	PPIF	0.493895	0.00883702	0.797924	6.1868e-07
FOS	Chr14_81316949_81318288	Con	ANXA11	0.615385	0.000634369	0.733822	1.32542e-05
FOS	Chr14_81316949_81318288	Con	ZCCHC24	0.420635	0.0289065	0.543956	0.00335804
FOSL2	Chr14_81316949_81318288	Con	ZMIZ1	0.498168	0.00818108	0.58547	0.00133549
FOSL2	Chr14_81316949_81318288	Con	PPIF	0.469475	0.0134882	0.797924	6.1868e-07
FOSL2	Chr14_81316949_81318288	Con	ANXA11	0.53663	0.00390461	0.733822	1.32542e-05
JUNB	Chr14_81316949_81318288	Con	PPIF	0.600733	0.000921832	0.797924	6.1868e-07
JUNB	Chr14_81316949_81318288	Con	ANXA11	0.722833	2.05687e-05	0.733822	1.32542e-05
JUNB	Chr14_81316949_81318288	Con	ZCCHC24	0.4884	0.0097446	0.543956	0.00335804
ZBTB18	Chr14_81316949_81318288	Con	ANXA11	0.382173	0.049152	0.733822	1.32542e-05
MYF5	Chr16_51435326_51437061	Con	RPL26L1	0.405372	0.0359297	0.469475	0.0134882
TGIF2	Chr16_51435326_51437061	Con	ERGIC1	0.385836	0.0468419	0.442613	0.0207811
TGIF2	Chr16_51435326_51437061	Con	RPL26L1	0.429182	0.0254863	0.469475	0.0134882
ATF3	Chr16_51450236_51450530	Con	CREBRF	0.661172	0.000173551	0.394383	0.0417843
FOS	Chr16_51450236_51450530	Con	CREBRF	0.694139	5.91775e-05	0.394383	0.0417843
FOSL2	Chr16_51450236_51450530	Con	CREBRF	0.608669	0.000754594	0.394383	0.0417843
JUNB	Chr16_51450236_51450530	Con	CREBRF	0.80525	4.06935e-07	0.394383	0.0417843
TGIF2	Chr16_51450236_51450530	Con	ERGIC1	0.385836	0.0468419	0.380952	0.0499417
SIX2	Chr17_51938393_51939194	Con	UBE2V1	0.465812	0.0143352	0.521978	0.00522758
ATF3	Chr17_51939416_51940052	Con	CEBPB	0.78022	1.59355e-06	0.442002	0.0209784
FOS	Chr17_51939416_51940052	Con	CEBPB	0.698413	5.09485e-05	0.442002	0.0209784
FOSL2	Chr17_51939416_51940052	Con	CEBPB	0.651404	0.000232941	0.442002	0.0209784
JUNB	Chr17_51939416_51940052	Con	UBE2V1	0.418193	0.0299489	0.464591	0.0146271
JUNB	Chr17_51939416_51940052	Con	CEBPB	0.808303	3.39987e-07	0.442002	0.0209784
MEF2D	Chr2_41428824_41430650	Con	KCNC1	0.90232	1.26849e-10	0.867521	4.70808e-09
MEF2D	Chr2_41428824_41430650	Con	USH1C	0.615995	0.000624318	0.851038	1.8573e-08
MEF2D	Chr2_41428824_41430650	Con	KCNJ11	0.830281	8.42408e-08	0.8779	1.8004e-09
MEF2A	Chr2_6775629_6776913	Con	CST6	0.43956	0.0217826	0.867521	4.70808e-09
MEF2A	Chr2_6775629_6776913	Con	FOSL1	0.490232	0.00943379	0.799756	5.58054e-07
MEF2A	Chr2_6775629_6776913	Con	CTSW	0.739316	1.05547e-05	0.877289	1.90966e-09
MEF2A	Chr2_6775629_6776913	Con	AP5B1	0.467033	0.0140481	0.893773	3.45123e-10
MEF2A	Chr2_6775629_6776913	Con	SLC25A45	0.569597	0.00192717	0.825397	1.16772e-07
MEF2A	Chr2_6775629_6776913	Con	ENSSSCG00000012998	0.437118	0.0226119	0.43956	0.0217826
MEF2A	Chr2_6775629_6776913	Con	ENSSSCG00000040674	0.380952	0.0499417	0.506105	0.00707104
MEF2A	Chr2_6775629_6776913	Con	ENSSSCG00000047888	0.478022	0.0116719	0.562882	0.00223844
MEF2D	Chr2_6775629_6776913	Con	CST6	0.832723	7.12746e-08	0.867521	4.70808e-09
MEF2D	Chr2_6775629_6776913	Con	ENSSSCG00000012961	0.713675	2.92135e-05	0.810745	2.93775e-07
MEF2D	Chr2_6775629_6776913	Con	FOSL1	0.876068	2.14646e-09	0.799756	5.58054e-07
MEF2D	Chr2_6775629_6776913	Con	CCDC85B	0.392552	0.0428298	0.60928	0.000742901
MEF2D	Chr2_6775629_6776913	Con	CTSW	0.769231	2.74847e-06	0.877289	1.90966e-09
MEF2D	Chr2_6775629_6776913	Con	MUS81	0.627595	0.000457999	0.711844	3.12873e-05
MEF2D	Chr2_6775629_6776913	Con	AP5B1	0.849817	2.04259e-08	0.893773	3.45123e-10
MEF2D	Chr2_6775629_6776913	Con	RNASEH2C	0.460317	0.0156879	0.518926	0.00554638
MEF2D	Chr2_6775629_6776913	Con	KCNK7	0.460317	0.0156879	0.456044	0.0168114
MEF2D	Chr2_6775629_6776913	Con	SLC25A45	0.811355	2.83147e-07	0.825397	1.16772e-07
MEF2D	Chr2_6775629_6776913	Con	ENSSSCG00000012998	0.459096	0.0160024	0.43956	0.0217826
MEF2D	Chr2_6775629_6776913	Con	CAPN1	0.45116	0.0181756	0.515873	0.00588148
MEF2D	Chr2_6775629_6776913	Con	MRPL49	0.48779	0.00985008	0.559219	0.00242574
MEF2D	Chr2_6775629_6776913	Con	ZNHIT2	0.642247	0.000304147	0.709402	3.42558e-05
MEF2D	Chr2_6775629_6776913	Con	NAALADL1	0.455433	0.0169771	0.578755	0.00156317
MEF2D	Chr2_6775629_6776913	Con	SAC3D1	0.617216	0.000604631	0.788767	1.02052e-06
MEF2D	Chr2_6775629_6776913	Con	PPP2R5B	0.626374	0.000473454	0.789377	9.87783e-07
MEF2D	Chr2_6775629_6776913	Con	BATF2	0.589744	0.00120604	0.733822	1.32542e-05
MEF2D	Chr2_6775629_6776913	Con	ATG2A	0.681319	9.13794e-05	0.424298	0.027398
MEF2D	Chr2_6775629_6776913	Con	SYVN1	0.438339	0.0221941	0.507937	0.00683375
MEF2D	Chr2_6775629_6776913	Con	EIF1AD	0.695971	5.55166e-05	0.80464	4.21672e-07
MEF2D	Chr2_6775629_6776913	Con	OVOL1	0.569597	0.00192717	0.476801	0.0119182
MEF2D	Chr2_6775629_6776913	Con	ENSSSCG00000030977	0.650794	0.000237185	0.46337	0.014924
MEF2D	Chr2_6775629_6776913	Con	ENSSSCG00000034387	0.399878	0.038769	0.464591	0.0146271
MEF2D	Chr2_6775629_6776913	Con	MAP3K11	0.515263	0.00595051	0.506105	0.00707104
MEF2D	Chr2_6775629_6776913	Con	FAU	0.438339	0.0221941	0.507937	0.00683375
MEF2D	Chr2_6775629_6776913	Con	ENSSSCG00000040674	0.440171	0.0215792	0.506105	0.00707104
MEF2D	Chr2_6775629_6776913	Con	ENSSSCG00000047888	0.617216	0.000604631	0.562882	0.00223844
SIX2	Chr2_6775629_6776913	Con	ENSSSCG00000012961	0.39011	0.0442559	0.810745	2.93775e-07
SIX2	Chr2_6775629_6776913	Con	DRAP1	0.431624	0.024572	0.696581	5.43418e-05
SIX2	Chr2_6775629_6776913	Con	C11orf68	0.423077	0.0278935	0.691087	6.57565e-05
SIX2	Chr2_6775629_6776913	Con	VPS51	0.650183	0.000241496	0.420635	0.0289065
SIX2	Chr2_6775629_6776913	Con	PPP2R5B	0.468254	0.0137658	0.789377	9.87783e-07
SIX2	Chr2_6775629_6776913	Con	EIF1AD	0.445055	0.0200073	0.80464	4.21672e-07
TEAD4	Chr2_6775629_6776913	Con	MUS81	0.39011	0.0442559	0.711844	3.12873e-05
TEAD4	Chr2_6775629_6776913	Con	KCNK7	0.41453	0.0315692	0.456044	0.0168114
TEAD4	Chr2_6775629_6776913	Con	PPP2R5B	0.393773	0.0421305	0.789377	9.87783e-07
TEAD4	Chr2_6775629_6776913	Con	BATF2	0.397436	0.040087	0.733822	1.32542e-05
FOXK1	Chr2_6785419_6786598	Con	EFEMP2	0.449939	0.0185305	0.545788	0.00323209
FOXK1	Chr2_6785419_6786598	Con	SCYL1	0.579976	0.00151945	0.389499	0.0446183
FOXK1	Chr2_6785419_6786598	Con	LTBP3	0.473748	0.0125528	0.407204	0.0350211
FOXK1	Chr2_6785419_6786598	Con	DPF2	0.434676	0.0234667	0.429182	0.0254863
MYF5	Chr2_6785419_6786598	Con	EFEMP2	0.774725	2.10069e-06	0.545788	0.00323209
MYF5	Chr2_6785419_6786598	Con	SCYL1	0.554945	0.00266111	0.389499	0.0446183
MYF5	Chr2_6785419_6786598	Con	LTBP3	0.473748	0.0125528	0.407204	0.0350211
MYF5	Chr2_6785419_6786598	Con	DPF2	0.595849	0.00104001	0.429182	0.0254863
MYF5	Chr2_6785419_6786598	Con	GAL3ST3	0.675824	0.000109375	0.520757	0.00535319
MYOG	Chr2_6785419_6786598	Con	EFEMP2	0.839438	4.43825e-08	0.545788	0.00323209
MYOG	Chr2_6785419_6786598	Con	SCYL1	0.614164	0.000654895	0.389499	0.0446183
MYOG	Chr2_6785419_6786598	Con	LTBP3	0.613553	0.000665374	0.407204	0.0350211
MYOG	Chr2_6785419_6786598	Con	GAL3ST3	0.578144	0.00158544	0.520757	0.00535319
NF1	Chr2_6785419_6786598	Con	EFEMP2	0.711233	3.20071e-05	0.545788	0.00323209
NF1	Chr2_6785419_6786598	Con	SCYL1	0.494505	0.0087407	0.389499	0.0446183
NF1	Chr2_6785419_6786598	Con	LTBP3	0.526252	0.00480743	0.407204	0.0350211
NF1	Chr2_6785419_6786598	Con	GAL3ST3	0.565934	0.00209198	0.520757	0.00535319
TCF12	Chr2_6785419_6786598	Con	EFEMP2	0.491453	0.00923123	0.545788	0.00323209
TCF12	Chr2_6785419_6786598	Con	DPF2	0.399267	0.0390952	0.429182	0.0254863
TCF4	Chr2_6785419_6786598	Con	EFEMP2	0.689255	7.00079e-05	0.545788	0.00323209
TCF4	Chr2_6785419_6786598	Con	SCYL1	0.498779	0.00809079	0.389499	0.0446183
TCF4	Chr2_6785419_6786598	Con	LTBP3	0.549451	0.00299226	0.407204	0.0350211
TCF4	Chr2_6785419_6786598	Con	GAL3ST3	0.499389	0.00800135	0.520757	0.00535319
TGIF2	Chr2_6785419_6786598	Con	EFEMP2	0.464591	0.0146271	0.545788	0.00323209
TGIF2	Chr2_6785419_6786598	Con	SCYL1	0.460928	0.0155326	0.389499	0.0446183
TGIF2	Chr2_6785419_6786598	Con	DPF2	0.499389	0.00800135	0.429182	0.0254863
TGIF2	Chr2_6785419_6786598	Con	GAL3ST3	0.530525	0.00441629	0.520757	0.00535319
SIX1	Chr2_6792267_6792461	Con	DRAP1	0.478632	0.0115504	0.486569	0.0100639
SIX1	Chr2_6792267_6792461	Con	C11orf68	0.47558	0.0121687	0.502442	0.00756649
SIX1	Chr2_6792267_6792461	Con	MUS81	0.43956	0.0217826	0.704518	4.09542e-05
SIX1	Chr2_6792267_6792461	Con	ZNHIT2	0.386447	0.0464653	0.651404	0.000232941
SIX2	Chr2_6792267_6792461	Con	ENSSSCG00000012961	0.39011	0.0442559	0.729548	1.57635e-05
SIX2	Chr2_6792267_6792461	Con	DRAP1	0.431624	0.024572	0.486569	0.0100639
SIX2	Chr2_6792267_6792461	Con	C11orf68	0.423077	0.0278935	0.502442	0.00756649
SIX2	Chr2_6792267_6792461	Con	PPP2R5B	0.468254	0.0137658	0.705739	3.91788e-05
SIX2	Chr2_6792267_6792461	Con	EIF1AD	0.445055	0.0200073	0.708791	3.50359e-05
ESRRB	Chr2_6813039_6814713	Con	ATG2A	0.421856	0.0283964	0.382173	0.049152
ESRRB	Chr2_6813039_6814713	Con	ENSSSCG00000030977	0.410256	0.0335478	0.559829	0.00239362
ESRRB	Chr2_6813039_6814713	Con	MAP3K11	0.465201	0.0144806	0.467643	0.0139063
MYOD1	Chr2_6813039_6814713	Con	OVOL1	0.454823	0.0171442	0.52381	0.00504386
MYOD1	Chr2_6813039_6814713	Con	MAP3K11	0.465812	0.0143352	0.467643	0.0139063
ESRRB	Chr2_6815336_6816037	Con	ATG2A	0.421856	0.0283964	0.498168	0.00818108
ESRRB	Chr2_6815336_6816037	Con	ENSSSCG00000030977	0.410256	0.0335478	0.590965	0.00117111
ESRRB	Chr2_6815336_6816037	Con	MAP3K11	0.465201	0.0144806	0.546398	0.00319101
ATF3	Chr2_76002248_76003232	Con	SGTA	0.532967	0.00420517	0.476801	0.0119182
SIX2	Chr2_76002248_76003232	Con	SGTA	0.515263	0.00595051	0.476801	0.0119182
ATF3	Chr2_76021931_76023010	Con	ZNF554	0.532357	0.00425713	0.40293	0.0371703
FOS	Chr2_76021931_76023010	Con	ZNF554	0.553724	0.00273185	0.40293	0.0371703
JUNB	Chr2_76021931_76023010	Con	ZNF554	0.576923	0.0016308	0.40293	0.0371703
ZBTB18	Chr2_76021931_76023010	Con	ZNF554	0.619048	0.000576117	0.40293	0.0371703
JUNB	Chr7_115263975_115264323	Con	ENSSSCG00000002464	0.51221	0.00630603	0.440171	0.0215792
JUNB	Chr7_115263975_115264323	Con	ASB2	0.822344	1.4249e-07	0.872405	3.02616e-09
JUNB	Chr7_115263975_115264323	Con	ISG12(A)	0.615995	0.000624318	0.676435	0.000107232
JUNB	Chr7_115263975_115264323	Con	CCDC197	0.52381	0.00504386	0.78022	1.59355e-06
JUNB	Chr7_115263975_115264323	Con	FAM181A	0.571429	0.00184904	0.680708	9.32403e-05
ATF3	Chr7_115265301_115266080	Con	ENSSSCG00000002464	0.600733	0.000921832	0.389499	0.0446183
ATF3	Chr7_115265301_115266080	Con	ASB2	0.752747	5.90403e-06	0.892552	3.95418e-10
ATF3	Chr7_115265301_115266080	Con	ISG12(A)	0.641026	0.000314954	0.58547	0.00133549
ATF3	Chr7_115265301_115266080	Con	CCDC197	0.58486	0.00135493	0.827839	9.93069e-08
ATF3	Chr7_115265301_115266080	Con	FAM181A	0.462759	0.0150743	0.631258	0.000414248
FOS	Chr7_115265301_115266080	Con	ENSSSCG00000002464	0.622711	0.000522587	0.389499	0.0446183
FOS	Chr7_115265301_115266080	Con	ASB2	0.803419	4.526e-07	0.892552	3.95418e-10
FOS	Chr7_115265301_115266080	Con	ISG12(A)	0.669719	0.000132981	0.58547	0.00133549
FOS	Chr7_115265301_115266080	Con	CCDC197	0.570208	0.00190081	0.827839	9.93069e-08
FOS	Chr7_115265301_115266080	Con	FAM181A	0.490842	0.00933205	0.631258	0.000414248
FOSL2	Chr7_115265301_115266080	Con	ENSSSCG00000002464	0.632479	0.000400501	0.389499	0.0446183
FOSL2	Chr7_115265301_115266080	Con	ASB2	0.528083	0.00463634	0.892552	3.95418e-10
FOSL2	Chr7_115265301_115266080	Con	ISG12(A)	0.425519	0.0269095	0.58547	0.00133549
JUNB	Chr7_115265301_115266080	Con	ENSSSCG00000002464	0.51221	0.00630603	0.389499	0.0446183
JUNB	Chr7_115265301_115266080	Con	ASB2	0.822344	1.4249e-07	0.892552	3.95418e-10
JUNB	Chr7_115265301_115266080	Con	ISG12(A)	0.615995	0.000624318	0.58547	0.00133549
JUNB	Chr7_115265301_115266080	Con	CCDC197	0.52381	0.00504386	0.827839	9.93069e-08
JUNB	Chr7_115265301_115266080	Con	FAM181A	0.571429	0.00184904	0.631258	0.000414248
ATF3	Chr7_115270468_115271916	Con	ENSSSCG00000002464	0.600733	0.000921832	0.498168	0.00818108
ATF3	Chr7_115270468_115271916	Con	ASB2	0.752747	5.90403e-06	0.915751	2.15084e-11
ATF3	Chr7_115270468_115271916	Con	ISG12(A)	0.641026	0.000314954	0.693529	6.04445e-05
ATF3	Chr7_115270468_115271916	Con	CCDC197	0.58486	0.00135493	0.672161	0.000123048
ATF3	Chr7_115270468_115271916	Con	FAM181A	0.462759	0.0150743	0.689866	6.85645e-05
ESRRB	Chr7_115270468_115271916	Con	ENSSSCG00000002464	0.508547	0.00675616	0.498168	0.00818108
FOS	Chr7_115270468_115271916	Con	ENSSSCG00000002464	0.622711	0.000522587	0.498168	0.00818108
FOS	Chr7_115270468_115271916	Con	ASB2	0.803419	4.526e-07	0.915751	2.15084e-11
FOS	Chr7_115270468_115271916	Con	ISG12(A)	0.669719	0.000132981	0.693529	6.04445e-05
FOS	Chr7_115270468_115271916	Con	CCDC197	0.570208	0.00190081	0.672161	0.000123048
FOS	Chr7_115270468_115271916	Con	FAM181A	0.490842	0.00933205	0.689866	6.85645e-05
FOSL2	Chr7_115270468_115271916	Con	ENSSSCG00000002464	0.632479	0.000400501	0.498168	0.00818108
FOSL2	Chr7_115270468_115271916	Con	ASB2	0.528083	0.00463634	0.915751	2.15084e-11
FOSL2	Chr7_115270468_115271916	Con	ISG12(A)	0.425519	0.0269095	0.693529	6.04445e-05
JUNB	Chr7_115270468_115271916	Con	ENSSSCG00000002464	0.51221	0.00630603	0.498168	0.00818108
JUNB	Chr7_115270468_115271916	Con	ASB2	0.822344	1.4249e-07	0.915751	2.15084e-11
JUNB	Chr7_115270468_115271916	Con	ISG12(A)	0.615995	0.000624318	0.693529	6.04445e-05
JUNB	Chr7_115270468_115271916	Con	CCDC197	0.52381	0.00504386	0.672161	0.000123048
JUNB	Chr7_115270468_115271916	Con	FAM181A	0.571429	0.00184904	0.689866	6.85645e-05
MEF2A	Chr7_115270468_115271916	Con	ENSSSCG00000002464	0.614164	0.000654895	0.498168	0.00818108
MEF2A	Chr7_115270468_115271916	Con	ASB2	0.656899	0.000197653	0.915751	2.15084e-11
MEF2A	Chr7_115270468_115271916	Con	ISG12(A)	0.445665	0.0198176	0.693529	6.04445e-05
MEF2A	Chr7_115270468_115271916	Con	FAM181A	0.521978	0.00522758	0.689866	6.85645e-05
MEF2D	Chr7_115270468_115271916	Con	ENSSSCG00000002464	0.611722	0.00069769	0.498168	0.00818108
MEF2D	Chr7_115270468_115271916	Con	ASB2	0.807082	3.6547e-07	0.915751	2.15084e-11
MEF2D	Chr7_115270468_115271916	Con	ISG12(A)	0.703907	4.18684e-05	0.693529	6.04445e-05
MEF2D	Chr7_115270468_115271916	Con	CCDC197	0.496337	0.00845701	0.672161	0.000123048
MEF2D	Chr7_115270468_115271916	Con	FAM181A	0.576313	0.0016539	0.689866	6.85645e-05
SIX2	Chr7_115270468_115271916	Con	CCDC197	0.40232	0.0374858	0.672161	0.000123048
MYF5	Chr7_32346988_32348164	Con	CDKN1A	0.617827	0.000594993	0.528083	0.00463634
MYF5	Chr7_32346988_32348164	Con	PXT1	0.824786	1.21551e-07	0.420024	0.0291643
MYOG	Chr7_32346988_32348164	Con	CDKN1A	0.65812	0.000190483	0.528083	0.00463634
MYOG	Chr7_32346988_32348164	Con	PXT1	0.697192	5.31891e-05	0.420024	0.0291643
TCF12	Chr7_32346988_32348164	Con	PXT1	0.57265	0.00179848	0.420024	0.0291643
TCF4	Chr7_32346988_32348164	Con	PXT1	0.727717	1.69628e-05	0.420024	0.0291643
TEAD2	Chr7_32346988_32348164	Con	CDKN1A	0.734432	1.29265e-05	0.528083	0.00463634
TEAD2	Chr7_32346988_32348164	Con	PXT1	0.784493	1.27841e-06	0.420024	0.0291643
TEAD3	Chr7_32346988_32348164	Con	CDKN1A	0.623321	0.000514102	0.528083	0.00463634
TEAD3	Chr7_32346988_32348164	Con	PXT1	0.689255	7.00079e-05	0.420024	0.0291643
TGIF2	Chr7_32346988_32348164	Con	CDKN1A	0.532967	0.00420517	0.528083	0.00463634
TGIF2	Chr7_32346988_32348164	Con	PXT1	0.388889	0.0449829	0.420024	0.0291643
MEF2A	Chr15_81657807_81658898	DN	LNPK	0.664835	0.000154994	0.6221	0.000531195
TEAD4	Chr15_81657807_81658898	DN	ENSSSCG00000051091	0.498779	0.00809079	0.586081	0.00131629
TCF4	Chr3_110586352_110586980	DN	ENSSSCG00000046984	0.39072	0.0438959	0.441765	0.0210556
ATF3	Chr3_112944356_112944705	DN	ASXL2	0.529304	0.00452518	0.425206	0.027034
FOS	Chr3_112944356_112944705	DN	ASXL2	0.573871	0.00174912	0.425206	0.027034
FOSL2	Chr3_112944356_112944705	DN	ASXL2	0.479853	0.0113105	0.425206	0.027034
JUNB	Chr3_112944356_112944705	DN	ASXL2	0.637363	0.000349423	0.425206	0.027034
ESRRB	Chr3_112957380_112958014	DN	CIB4	0.416972	0.0304814	0.417236	0.0303653
ESRRB	Chr3_112957380_112958014	DN	HADHB	0.473748	0.0125528	0.4495	0.0186593
ESRRB	Chr3_112957380_112958014	DN	HADHA	0.520757	0.00535319	0.399695	0.0388665
ESRRB	Chr3_112957380_112958014	DN	ENSSSCG00000033644	0.43895	0.0219876	0.475812	0.0121207
MEF2A	Chr3_112957380_112958014	DN	RAB10	0.644689	0.000283505	0.435718	0.023099
MEF2A	Chr3_112957380_112958014	DN	KIF3C	0.552503	0.00280419	0.47362	0.0125801
MEF2A	Chr3_112957380_112958014	DN	ENSSSCG00000033644	0.394383	0.0417843	0.475812	0.0121207
MEF2D	Chr3_112957380_112958014	DN	CIB4	0.512821	0.00623353	0.417236	0.0303653
MEF2D	Chr3_112957380_112958014	DN	HADHB	0.80525	4.06935e-07	0.4495	0.0186593
MEF2D	Chr3_112957380_112958014	DN	HADHA	0.674603	0.000113776	0.399695	0.0388665
MEF2D	Chr3_112957380_112958014	DN	RAB10	0.802808	4.68818e-07	0.435718	0.023099
MEF2D	Chr3_112957380_112958014	DN	KIF3C	0.428571	0.0257192	0.47362	0.0125801
MEF2D	Chr3_112957380_112958014	DN	ENSSSCG00000033644	0.79304	8.10451e-07	0.475812	0.0121207
ZBTB18	Chr3_112957380_112958014	DN	RAB10	0.522589	0.00516572	0.435718	0.023099
FOXK1	Chr4_110592710_110594151	DN	SLC6A17	0.650183	0.000241496	0.437729	0.0224022
FOXK1	Chr4_110592710_110594151	DN	STRIP1	0.571429	0.00184904	0.5	0.00791274
FOXK1	Chr4_110592710_110594151	DN	GSTM3	0.562271	0.00226876	0.406593	0.0353219
FOXK1	Chr4_110592710_110594151	DN	GNAT2	0.412698	0.0324053	0.432234	0.0243476
FOXK1	Chr4_110592710_110594151	DN	MYBPHL	0.537241	0.00385634	0.452381	0.0178263
FOXK1	Chr4_110592710_110594151	DN	GPSM2	0.470085	0.0133511	0.395604	0.0410987
FOXK1	Chr4_110592710_110594151	DN	PSRC1	0.522589	0.00516572	0.468864	0.0136264
MEF2C	Chr4_110592710_110594151	DN	SLC6A17	0.774115	2.16516e-06	0.437729	0.0224022
MEF2C	Chr4_110592710_110594151	DN	STRIP1	0.517705	0.00567843	0.5	0.00791274
MEF2C	Chr4_110592710_110594151	DN	GSTM3	0.547619	0.0031102	0.406593	0.0353219
MEF2C	Chr4_110592710_110594151	DN	GNAT2	0.816239	2.09842e-07	0.432234	0.0243476
MEF2C	Chr4_110592710_110594151	DN	MYBPHL	0.565324	0.00212059	0.452381	0.0178263
MEF2C	Chr4_110592710_110594151	DN	GPSM2	0.580586	0.00149798	0.395604	0.0410987
MEF2C	Chr4_110592710_110594151	DN	PSRC1	0.434066	0.0236844	0.468864	0.0136264
MYF5	Chr4_110592710_110594151	DN	SLC6A17	0.545177	0.00327362	0.437729	0.0224022
MYF5	Chr4_110592710_110594151	DN	STRIP1	0.924908	5.36866e-12	0.5	0.00791274
MYF5	Chr4_110592710_110594151	DN	GSTM3	0.856532	1.1979e-08	0.406593	0.0353219
MYF5	Chr4_110592710_110594151	DN	GNAT2	0.43956	0.0217826	0.432234	0.0243476
MYF5	Chr4_110592710_110594151	DN	MYBPHL	0.842491	3.55296e-08	0.452381	0.0178263
MYF5	Chr4_110592710_110594151	DN	GPSM2	0.898046	2.1155e-10	0.395604	0.0410987
MYF5	Chr4_110592710_110594151	DN	PSRC1	0.915751	2.15084e-11	0.468864	0.0136264
MYOG	Chr4_110592710_110594151	DN	SLC6A17	0.598291	0.000979376	0.437729	0.0224022
MYOG	Chr4_110592710_110594151	DN	STRIP1	0.823565	1.31644e-07	0.5	0.00791274
MYOG	Chr4_110592710_110594151	DN	GSTM3	0.836996	5.28548e-08	0.406593	0.0353219
MYOG	Chr4_110592710_110594151	DN	GNAT2	0.500611	0.00782495	0.432234	0.0243476
MYOG	Chr4_110592710_110594151	DN	MYBPHL	0.782662	1.40586e-06	0.452381	0.0178263
MYOG	Chr4_110592710_110594151	DN	GPSM2	0.813187	2.53313e-07	0.395604	0.0410987
MYOG	Chr4_110592710_110594151	DN	PSRC1	0.843712	3.24618e-08	0.468864	0.0136264
NF1	Chr4_110592710_110594151	DN	SLC6A17	0.718559	2.42685e-05	0.437729	0.0224022
NF1	Chr4_110592710_110594151	DN	STRIP1	0.730769	1.50065e-05	0.5	0.00791274
NF1	Chr4_110592710_110594151	DN	GSTM3	0.630037	0.000428406	0.406593	0.0353219
NF1	Chr4_110592710_110594151	DN	GNAT2	0.579976	0.00151945	0.432234	0.0243476
NF1	Chr4_110592710_110594151	DN	MYBPHL	0.793651	7.83861e-07	0.452381	0.0178263
NF1	Chr4_110592710_110594151	DN	GPSM2	0.804029	4.36889e-07	0.395604	0.0410987
NF1	Chr4_110592710_110594151	DN	PSRC1	0.692308	6.3051e-05	0.468864	0.0136264
TCF12	Chr4_110592710_110594151	DN	SLC6A17	0.732601	1.39319e-05	0.437729	0.0224022
TCF12	Chr4_110592710_110594151	DN	STRIP1	0.637973	0.000343459	0.5	0.00791274
TCF12	Chr4_110592710_110594151	DN	GSTM3	0.522589	0.00516572	0.406593	0.0353219
TCF12	Chr4_110592710_110594151	DN	GNAT2	0.686813	7.60545e-05	0.432234	0.0243476
TCF12	Chr4_110592710_110594151	DN	MYBPHL	0.675824	0.000109375	0.452381	0.0178263
TCF12	Chr4_110592710_110594151	DN	GPSM2	0.703297	4.28007e-05	0.395604	0.0410987
TCF12	Chr4_110592710_110594151	DN	PSRC1	0.510989	0.00645317	0.468864	0.0136264
TCF4	Chr4_110592710_110594151	DN	SLC6A17	0.71978	2.31553e-05	0.437729	0.0224022
TCF4	Chr4_110592710_110594151	DN	STRIP1	0.698413	5.09485e-05	0.5	0.00791274
TCF4	Chr4_110592710_110594151	DN	GSTM3	0.629426	0.000435643	0.406593	0.0353219
TCF4	Chr4_110592710_110594151	DN	GNAT2	0.634921	0.000374199	0.432234	0.0243476
TCF4	Chr4_110592710_110594151	DN	MYBPHL	0.752137	6.06675e-06	0.452381	0.0178263
TCF4	Chr4_110592710_110594151	DN	GPSM2	0.730159	1.53808e-05	0.395604	0.0410987
TCF4	Chr4_110592710_110594151	DN	PSRC1	0.714896	2.78998e-05	0.468864	0.0136264
TEAD2	Chr4_110592710_110594151	DN	SLC6A17	0.547619	0.0031102	0.437729	0.0224022
TEAD2	Chr4_110592710_110594151	DN	STRIP1	0.92735	3.59934e-12	0.5	0.00791274
TEAD2	Chr4_110592710_110594151	DN	GSTM3	0.918193	1.50934e-11	0.406593	0.0353219
TEAD2	Chr4_110592710_110594151	DN	GNAT2	0.429792	0.0252552	0.432234	0.0243476
TEAD2	Chr4_110592710_110594151	DN	MYBPHL	0.80525	4.06935e-07	0.452381	0.0178263
TEAD2	Chr4_110592710_110594151	DN	GPSM2	0.844933	2.96361e-08	0.395604	0.0410987
TEAD2	Chr4_110592710_110594151	DN	PSRC1	0.931013	1.92356e-12	0.468864	0.0136264
TEAD3	Chr4_110592710_110594151	DN	SLC6A17	0.808303	3.39987e-07	0.437729	0.0224022
TEAD3	Chr4_110592710_110594151	DN	STRIP1	0.727106	1.73803e-05	0.5	0.00791274
TEAD3	Chr4_110592710_110594151	DN	GSTM3	0.819902	1.6664e-07	0.406593	0.0353219
TEAD3	Chr4_110592710_110594151	DN	GNAT2	0.697192	5.31891e-05	0.432234	0.0243476
TEAD3	Chr4_110592710_110594151	DN	MYBPHL	0.702686	4.37514e-05	0.452381	0.0178263
TEAD3	Chr4_110592710_110594151	DN	GPSM2	0.669719	0.000132981	0.395604	0.0410987
TEAD3	Chr4_110592710_110594151	DN	PSRC1	0.705739	3.91788e-05	0.468864	0.0136264
TGIF2	Chr4_110592710_110594151	DN	STRIP1	0.543346	0.00340094	0.5	0.00791274
TGIF2	Chr4_110592710_110594151	DN	GSTM3	0.53602	0.0039534	0.406593	0.0353219
TGIF2	Chr4_110592710_110594151	DN	MYBPHL	0.578755	0.00156317	0.452381	0.0178263
TGIF2	Chr4_110592710_110594151	DN	GPSM2	0.434676	0.0234667	0.395604	0.0410987
TGIF2	Chr4_110592710_110594151	DN	PSRC1	0.562271	0.00226876	0.468864	0.0136264
ATF3	Chr6_3617560_3619542	DN	GSE1	0.748474	7.1303e-06	0.423077	0.0278935
MEF2A	Chr6_3617560_3619542	DN	GSE1	0.445055	0.0200073	0.423077	0.0278935
MEF2D	Chr6_3617560_3619542	DN	GSE1	0.763736	3.57032e-06	0.423077	0.0278935
MYF5	Chr7_57675524_57677125	DN	HMG20A	0.879121	1.59879e-09	0.467643	0.0139063
MYOG	Chr7_57675524_57677125	DN	HMG20A	0.652015	0.000228764	0.467643	0.0139063
NF1	Chr7_57675524_57677125	DN	HMG20A	0.687424	7.45011e-05	0.467643	0.0139063
TCF12	Chr7_57675524_57677125	DN	HMG20A	0.689866	6.85645e-05	0.467643	0.0139063
TCF4	Chr7_57675524_57677125	DN	HMG20A	0.627595	0.000457999	0.467643	0.0139063
TEAD3	Chr7_57675524_57677125	DN	HMG20A	0.728327	1.65543e-05	0.467643	0.0139063
TGIF2	Chr7_57675524_57677125	DN	HMG20A	0.564713	0.00214954	0.467643	0.0139063
MYF5	Chr10_42260034_42262062	TH	ENSSSCG00000022045	0.727106	1.73803e-05	0.623321	0.000514102
MYOG	Chr10_42260034_42262062	TH	ENSSSCG00000022045	0.724054	1.96084e-05	0.623321	0.000514102
TCF4	Chr10_42260034_42262062	TH	ENSSSCG00000022045	0.625763	0.000481351	0.623321	0.000514102
TEAD2	Chr10_42260034_42262062	TH	ENSSSCG00000022045	0.741148	9.771e-06	0.623321	0.000514102
TEAD3	Chr10_42260034_42262062	TH	ENSSSCG00000022045	0.456044	0.0168114	0.623321	0.000514102
TGIF2	Chr10_42260034_42262062	TH	ENSSSCG00000022045	0.449328	0.01871	0.623321	0.000514102
FOXK1	Chr1_208628104_208629260	TH	ENSSSCG00000047994	0.444444	0.0201985	0.519991	0.00543328
MEF2C	Chr1_208628104_208629260	TH	ENSSSCG00000047994	0.676435	0.000107232	0.519991	0.00543328
TCF4	Chr1_208628104_208629260	TH	ENSSSCG00000047994	0.572039	0.00182361	0.519991	0.00543328
TEAD2	Chr1_208628104_208629260	TH	ENSSSCG00000047994	0.620269	0.000557765	0.519991	0.00543328
TEAD3	Chr1_208628104_208629260	TH	ENSSSCG00000047994	0.784493	1.27841e-06	0.519991	0.00543328
TGIF2	Chr1_208628104_208629260	TH	ENSSSCG00000047994	0.432234	0.0243476	0.519991	0.00543328
CTCF	Chr7_57577829_57579711	TH	HMG20A	0.697802	5.20581e-05	0.509158	0.00667931
MYOG	Chr7_57577829_57579711	TH	HMG20A	0.652015	0.000228764	0.509158	0.00667931
TCF12	Chr7_57577829_57579711	TH	HMG20A	0.689866	6.85645e-05	0.509158	0.00667931
TCF4	Chr7_57577829_57579711	TH	HMG20A	0.627595	0.000457999	0.509158	0.00667931
TEAD2	Chr7_57577829_57579711	TH	HMG20A	0.799145	5.77639e-07	0.509158	0.00667931
TEAD3	Chr7_57577829_57579711	TH	HMG20A	0.728327	1.65543e-05	0.509158	0.00667931
TGIF2	Chr7_57577829_57579711	TH	HMG20A	0.564713	0.00214954	0.509158	0.00667931
