# Supplementary material for: Analyzing super-enhancer temporal dynamics reveals potential critical enhancers and their gene regulatory networks underlying skeletal muscle development
Source: HighWire-hosted journal article supplement (doi:10.1101/gr.278344.123), 2024-10-21
Supplement: Supplemental_Tables_S7.xlsx [file Supplemental_Tables_S7.xlsx]

## Sheet: Supplemental_Table_S7
Supplemental Table S7. Overlap between regulatory SNPs and cis-eQTLs from porcine skeletal muscle
Regulatory SNP	cis-QTL	Phenotype	tss_distance	pval_nominal	slope	Candidate critical enhancer	Pattern
Chr1_189633129	Chr1_189633129_T_A	C14orf39	161592	3.98408e-12	-0.311043	Chr1_189631409_189633032	Con
Chr2_6777241	Chr2_6777241_G_A	FRMD8	-66737	9.42996e-09	-0.132691	Chr2_6775629_6776913	Con
Chr2_6785466	Chr2_6785466_C_T	AP5B1	237439	2.00099e-07	-0.105621	Chr2_6785419_6786598	Con
Chr2_6785466	Chr2_6785466_C_T	KCNK7	126213	3.90692e-59	0.493125	Chr2_6785419_6786598	Con
Chr2_6785466	Chr2_6785466_C_T	FRMD8	-58512	1.97993e-09	0.129286	Chr2_6785419_6786598	Con
Chr2_6785466	Chr2_6785466_C_T	ENSSSCG00000012997	-164713	1.39684e-08	-0.132489	Chr2_6785419_6786598	Con
Chr2_6785466	Chr2_6785466_C_T	MRPL49	-286346	4.37258e-05	-0.132851	Chr2_6785419_6786598	Con
Chr2_6785466	Chr2_6785466_C_T	ZNHIT2	-289561	4.49192e-08	-0.0992516	Chr2_6785419_6786598	Con
Chr2_6785466	Chr2_6785466_C_T	NAALADL1	-342158	4.51043e-08	0.203178	Chr2_6785419_6786598	Con
Chr2_6785466	Chr2_6785466_C_T	SAC3D1	-356432	2.4271e-06	-0.0987705	Chr2_6785419_6786598	Con
Chr2_6792360	Chr2_6792360_C_A	AP5B1	244333	2.22822e-05	-0.0804623	Chr2_6792267_6792461	Con
Chr2_6792360	Chr2_6792360_C_A	KCNK7	133107	3.91259e-45	0.404552	Chr2_6792267_6792461	Con
Chr2_6792360	Chr2_6792360_C_A	FRMD8	-51618	8.84184e-05	0.0790816	Chr2_6792267_6792461	Con
Chr2_6792360	Chr2_6792360_C_A	ENSSSCG00000012997	-157819	2.58093e-08	-0.121247	Chr2_6792267_6792461	Con
Chr2_6792360	Chr2_6792360_C_A	ZNHIT2	-282667	4.42558e-08	-0.0925835	Chr2_6792267_6792461	Con
Chr2_6792360	Chr2_6792360_C_A	NAALADL1	-335264	7.34957e-05	0.13769	Chr2_6792267_6792461	Con
Chr2_6792360	Chr2_6792360_C_A	EHD1	-505899	1.14992e-05	0.074339	Chr2_6792267_6792461	Con
Chr2_6792442	Chr2_6792442_G_A	AP5B1	244415	3.28723e-05	-0.078505	Chr2_6792267_6792461	Con
Chr2_6792442	Chr2_6792442_G_A	KCNK7	133189	1.34425e-44	0.400714	Chr2_6792267_6792461	Con
Chr2_6792442	Chr2_6792442_G_A	FRMD8	-51536	2.72469e-05	0.0842735	Chr2_6792267_6792461	Con
Chr2_6792442	Chr2_6792442_G_A	ENSSSCG00000012997	-157737	1.3198e-08	-0.123271	Chr2_6792267_6792461	Con
Chr2_6792442	Chr2_6792442_G_A	ZNHIT2	-282585	1.13857e-07	-0.0894033	Chr2_6792267_6792461	Con
Chr2_6792442	Chr2_6792442_G_A	NAALADL1	-335182	4.87866e-05	0.140496	Chr2_6792267_6792461	Con
Chr2_6792442	Chr2_6792442_G_A	EHD1	-505817	8.66374e-06	0.0750846	Chr2_6792267_6792461	Con
Chr2_6792460	Chr2_6792460_A_G	AP5B1	244433	3.13849e-05	-0.0787461	Chr2_6792267_6792461	Con
Chr2_6792460	Chr2_6792460_A_G	KCNK7	133207	5.04959e-44	0.398429	Chr2_6792267_6792461	Con
Chr2_6792460	Chr2_6792460_A_G	FRMD8	-51518	3.89928e-05	0.0826824	Chr2_6792267_6792461	Con
Chr2_6792460	Chr2_6792460_A_G	ENSSSCG00000012997	-157719	4.64849e-09	-0.127104	Chr2_6792267_6792461	Con
Chr2_6792460	Chr2_6792460_A_G	ZNHIT2	-282567	4.84206e-07	-0.0849322	Chr2_6792267_6792461	Con
Chr2_6792460	Chr2_6792460_A_G	NAALADL1	-335164	8.58763e-05	0.135962	Chr2_6792267_6792461	Con
Chr2_6792460	Chr2_6792460_A_G	EHD1	-505799	9.19491e-06	0.0749105	Chr2_6792267_6792461	Con
Chr2_6813383	Chr2_6813383_G_A	AP5B1	265356	9.7397e-08	0.144199	Chr2_6813039_6814713	Con
Chr2_6813383	Chr2_6813383_G_A	KCNK7	154130	2.60618e-05	-0.178396	Chr2_6813039_6814713	Con
Chr2_6813383	Chr2_6813383_G_A	EHBP1L1	134355	5.7018e-05	-0.12311	Chr2_6813039_6814713	Con
Chr2_6813383	Chr2_6813383_G_A	SLC25A45	-38222	3.48852e-05	0.116577	Chr2_6813039_6814713	Con
Chr2_6813396	Chr2_6813396_C_T	CCS	977332	4.07883e-08	0.117838	Chr2_6813039_6814713	Con
Chr2_6813396	Chr2_6813396_C_T	KCNK7	154143	6.10577e-31	0.479156	Chr2_6813039_6814713	Con
Chr2_6813396	Chr2_6813396_C_T	FRMD8	-30582	5.97694e-06	0.130106	Chr2_6813039_6814713	Con
Chr2_6813396	Chr2_6813396_C_T	ENSSSCG00000012997	-136783	2.70492e-05	-0.130675	Chr2_6813039_6814713	Con
Chr2_6813396	Chr2_6813396_C_T	SPDYC	-245486	4.04128e-06	0.218036	Chr2_6813039_6814713	Con
Chr2_6816061	Chr2_6816061_C_T	CCS	979997	8.57292e-06	0.0684208	Chr2_6815336_6816037	Con
Chr2_6816061	Chr2_6816061_C_T	PACS1	604377	3.04815e-06	-0.0710206	Chr2_6815336_6816037	Con
Chr2_6816061	Chr2_6816061_C_T	KCNK7	156808	8.23592e-14	0.224316	Chr2_6815336_6816037	Con
Chr2_6816061	Chr2_6816061_C_T	SCYL1	82612	6.54138e-05	-0.069389	Chr2_6815336_6816037	Con
Chr2_6816061	Chr2_6816061_C_T	ENSSSCG00000012997	-134118	1.75724e-05	-0.095507	Chr2_6815336_6816037	Con
Chr2_6816061	Chr2_6816061_C_T	NAALADL1	-311563	1.31565e-09	0.213779	Chr2_6815336_6816037	Con
Chr2_6816212	Chr2_6816212_A_G	KCNK7	156959	2.26534e-11	0.269421	Chr2_6815336_6816037	Con
Chr2_6816212	Chr2_6816212_A_G	FRMD8	-27766	2.13972e-07	0.142342	Chr2_6815336_6816037	Con
Chr2_6816212	Chr2_6816212_A_G	TIGD3	-50577	0.000125944	0.145643	Chr2_6815336_6816037	Con
Chr2_76002068	Chr2_76002068_C_T	ENSSSCG00000013471	234360	2.40186e-05	0.200313	Chr2_76002248_76003232	Con
Chr6_71160313	Chr6_71160313_G_C	CLSTN1	995139	4.40284e-06	0.074743	Chr6_71160532_71161325	TS
Chr6_71160313	Chr6_71160313_G_C	LZIC	888373	2.7187e-07	0.153193	Chr6_71160532_71161325	TS
Chr6_71160313	Chr6_71160313_G_C	NMNAT1	888283	2.29988e-41	-0.266932	Chr6_71160532_71161325	TS
Chr6_71160313	Chr6_71160313_G_C	RBP7	847048	1.46011e-06	0.17386	Chr6_71160532_71161325	TS
Chr6_71160313	Chr6_71160313_G_C	UBE4B	814500	7.22126e-16	0.17598	Chr6_71160532_71161325	TS
Chr6_71160313	Chr6_71160313_G_C	DFFA	424077	3.22704e-23	0.282594	Chr6_71160532_71161325	TS
Chr6_71160313	Chr6_71160313_G_C	PEX14	422408	1.66511e-13	-0.168119	Chr6_71160532_71161325	TS
Chr6_71160313	Chr6_71160313_G_C	ENSSSCG00000003421	-582948	1.64052e-11	-0.130829	Chr6_71160532_71161325	TS
Chr6_71160313	Chr6_71160313_G_C	MAD2L2	-618870	3.484e-09	0.122805	Chr6_71160532_71161325	TS
Chr7_86162783	Chr7_86162783_G_A	FAM174B	-106176	5.83365e-12	0.21897	Chr7_86162944_86164792	Con
Chr7_115264719	Chr7_115264719_C_T	CCDC197	-15867	0.000101078	-0.179117	Chr7_115263975_115264323	Con
Chr12_34231267	Chr12_34231267_C_T	CUEDC1	63308	1.42374e-16	-0.191623	Chr12_34230720_34231974	Con
Chr12_34231267	Chr12_34231267_C_T	TSPOAP1	-375374	1.61755e-08	0.210526	Chr12_34230720_34231974	Con
Chr12_34231458	Chr12_34231458_T_A	CUEDC1	63499	6.77478e-19	-0.177242	Chr12_34230720_34231974	Con
Chr12_34231458	Chr12_34231458_T_A	TSPOAP1	-375183	2.35193e-05	0.136302	Chr12_34230720_34231974	Con
Chr16_51450297	Chr16_51450297_C_T	CREBRF	189612	0.000325071	0.0653499	Chr16_51450236_51450530	Con
