# Supplementary material for: Analyzing super-enhancer temporal dynamics reveals potential critical enhancers and their gene regulatory networks underlying skeletal muscle development
Source: HighWire-hosted journal article supplement (doi:10.1101/gr.278344.123), 2024-10-21
Supplement: Supplemental_Tables_S8.xlsx [file Supplemental_Tables_S8.xlsx]

## Sheet: Supplemental_Table_S8
Supplemental Table S8. qPCR primers for myogenic markers and potential target gene
Gene	F	R
Myod1	ACTTCTATGATGACCCGTGTTT	ACATGCTCATCCTCACGAG
Myog	CCATCCAGTACATTGAGCGCCTACA	ACGATGGACGTAAGGGAGTGCAGAT
Mef2c	AACAGTTTGGTGTACAGCAATC	TTGGAGGTCTATGTGTTACACC
Myhc	CAAGTCATCGGTGTTTGTGG	CAAGTCATCGGTGTTTGTGG
Akap1	CAAAGGTAGCAGCAATACTTCG	CTTCAGTTGCTTCCAAGATCAC
